# Supplementary material for: Identification of the meiotic toolkit in diatoms and exploration of meiosis-specific SPO11 and RAD51 homologs in the sexual species Pseudo-nitzschia multistriata and Seminavis robusta
Source: PubMed Central journal article supplement (PMC4647503; doi:10.1186/s12864-015-1983-5), 2015-11-14
Supplement: 12864_2015_1983_MOESM2_ESM.pdf [file 12864_2015_1983_MOESM2_ESM.pdf]

Additional file 2. Multiple sequence alignment of Rad21 and Rec8 proteins used in phylogenetic analysis of Rad21/Rec8 protein family (in figure 1).

```

Arabidopsis_thaliana_Rec8_(SYN1) : MFYSHQLAR-KAPL---GQIWMMAATL----HAKIKRKKDKLDTIQICEEELN-----E-SVPMALRLSGIIMGSAIVWVRKVKALYD : 76
Oryza_sativa_Rec8 : GLLRSPHLSIASFRLLFSCAVRMAAATL----HAKIKRKKDKLDTIQICEEELN-----E-SVPMALRLSGIIMGSAIVWVRKVKALYD : 81
Oryza_sativa_Rad21-4/Rec8 : MFYSHQLAR-KAPL---GQIWMMAATL----HAKIKRKKDKLDTIQICEEELN-----E-SVPMALRLSGIIMGSAIVWVRKVKALYD : 76
Homo_sapiens_Rec8 : MFYYPNVLQRHTGCF---ATITWLAATR---GSRILVREYLRVNVVKTCEEELNYVLVVRVQPPVAGL-RPRFSLYLSAQLQIGVIRVVSQQCCQYVE : 90
Mus_musculus_Rec8 : MFYYPNVLQRHTGCF---ATITWLAATR---GSRILVREYLRVNVVKTCEEELNYVLVVRVQPPVAGL-RPRFSLYLSAQLQIGVIRVVSQQCCQYVE : 90
Schizosaccharomyces_pombe_Rec8 : MFYNQDVLTEKKGVM---GVITWLAATLGSKSHLRKIKKDKDMSVDIDEACDFWAF-----S-PEPLALRLSSNMLMGVIRVWVAHQYSFEHS : 82
Sordaria_macrospora_Rec8 : MFYSHEILTNQOYGV---ATVWLVSTFGLRSSNRKISRKALQEVNVRKACETLQ-----E-GAPIALRLQSGSLYGVSRVFSQQCSYVLT : 82
Neurospora_crassa_Rec8 : MFYSHEILTNQOYGV---ATVWLVSTFGLRSSNRKISRKALQEVNVRKACETLQ-----E-GAPIALRLQSGSLYGVSRVFSQQCSYVLT : 82
Arabidopsis_thaliana_Rad21 : MFYSHQLVSR-KGPL---GAIWVAALF---FKKIKRKSQVQKATHIPSSVDQLQ-----KELDAITFRVLAIVLLGIVRIYSRKKVDFEFD : 77
Oryza_sativa_Rad21 : MFYSQFHLAK-KGPL---GTITWLAHL---ERKIKRKNQVADTDIGVSVDSLIF---E-EVPIALRLSSHMLLGGVRIYSRKKVNYEFH : 76
Ricinus_communis_Rad21 : MFYSQTFAR-KGPL---GTVWCAHL---QHRLKKSHTYSTDISSTVDREMF---E-EVPIALRMSGHLLLGIVRIYSRKKVDFEYH : 76
Theobroma_cacao_Rad21 : MFYSQTFAR-KGPL---GTVWCAHL---QHRLKKSHTYAAIDIPSTVDLEMF---E-EVPIALRMSGHLLLGIVRIYSRKKVDFEYH : 76
Zea_mays_Rad21 : MFYSQFHLAK-KGPL---GTITWLAHL---ERKIKRKNQVADTDIGVSVDSLIF---E-EVPIALRLSSHMLLGGVRIYSRKKVNYEFH : 76
Arabidopsis_thaliana_Rad21-3 : MFYSHQLAR-KGPL---GTVWCAHL---HQRKIKKSQYTSINIPDITVDNEMF---E-EVPIALRLSSHMLLGGVRIYSRKKVDFEYH : 76
Arabidopsis_thaliana_Rad21-4 : MFYSQFHLAK-KGPL---GTITWLAHL---ERKIKRKNQVADTDIGVSVDSLIF---E-EVPIALRLSSHMLLGGVRIYSRKKVNYEFH : 76
Oryza_sativa_Rad21-2 : MDCSKVHLAK-KGVL---GTVWVAASVSG---VAALSRDQVVRTVWVACVDEKILP-----DDNDKTTYRVLGLLGLGIVRIYSRKKVDFEYH : 78
Oryza_sativa_Rad21-3 : MFYSHQLAR-KSPL---GTVWVAHL---ERKIKRKNQVADTDIGVSVDSLIF---E-EVPIALRLSSHMLLGGVRIYSRKKVNYEFH : 76
Homo_sapiens_Rad21 : MFVAHFVLSK-RGPL---AKIWLAAHW---DKKIKTAAHVFEENLESSVESLIS---E-KVKMALRTSGHLLLGIVRIYHRRKAKVLLA : 76
Mus_musculus_Rad21 : MFVAHFVLSK-RGPL---AKIWLAAHW---DKKIKTAAHVFEENLESSVESLIS---E-KVKMALRTSGHLLLGIVRIYHRRKAKVLLA : 76
Danio_rerio_Rad21 : MFVAHFVLSK-RGPL---AKIWLAAHW---DKKIKTAAHVFEENLESSVESLIS---E-KVKMALRTSGHLLLGIVRIYHRRKAKVLLA : 76
Xenopus_(Silurana)_tropicalis_Rad21 : MFVAHFVLSK-RGPL---AKIWLAAHW---DKKIKTAAHVFEENLESSVESLIS---E-KVKMALRTSGHLLLGIVRIYHRRKAKVLLA : 76
Drosophila_melanogaster_Rad21 : MFVEHTLAK-KGPL---ARVWLAHW---DKKIKTAAHVFEENLESSVESLIS---E-KVKMALRTSGHLLLGIVRIYSRKKAKVLLA : 76
Caenorhabditis_elegans_Rad21 : MFVAQFVLA-KGPL---AKVWLAHW---ERKIKRKNQVADTDIGVSVDSLIF---E-EVPIALRLSSHMLLGGVRIYSRKKVNYEFH : 76
Schizosaccharomyces_pombe_Rad21 : MFYSQFHLAK-KGPL---AKVWLAHW---ERKIKRKNQVADTDIGVSVDSLIF---E-EVPIALRLSSHMLLGGVRIYSRKKAKVLLA : 76
Sordaria_macrospora_Rad21 : MFVSGTILSA-TGPI---AKAVLSANQ---ERKIKRKNQVADTDIGVSVDSLIF---E-EVPIALRLSSHMLLGGVRIYSRKKAKVLLA : 76
Neurospora_crassa_Rad21 : MFVSGTILSA-TGPI---AKAVLSANQ---ERKIKRKNQVADTDIGVSVDSLIF---E-EVPIALRLSSHMLLGGVRIYSRKKAKVLLA : 76
Aspergillus_niger_Rad21 : MFVSETLAK-KGPI---ARVWLSANL---DKKIKRKNQVADTDIGVSVDSLIF---E-EVPIALRLSSHMLLGGVRIYSRKKAKVLLA : 76
Thalassiosira_pseudonana_Rad21 : MFVAQFVLA-KGPL---GKIVWLAHW---DKKIKRKNQVADTDIGVSVDSLIF---E-EVPIALRLSSHMLLGGVRIYSRKKAKVLLA : 76
Phaeodactylum_tricornutum_Rad21 : MFVSIHLAK-KGPI---GKIVWLAHW---DKKIKRKNQVADTDIGVSVDSLIF---E-EVPIALRLSSHMLLGGVRIYSRKKAKVLLA : 76
Fragilariopsis_cylindrus_Rad21 : MFVSIHLAK-KGPI---GKIVWLAHW---DKKIKRKNQVADTDIGVSVDSLIF---E-EVPIALRLSSHMLLGGVRIYSRKKAKVLLA : 76
Pseudo-nitzschia_multiseriata_Rad21 : MEHG---SSPL---GCLW---KDW-----ACCAAT-----TRRASFLLD : 30
Pseudo-nitzschia_multiseriata_Rad21 : MFVSIHLAK-KGPI---GKIVWLAHW---DKKIKRKNQVADTDIGVSVDSLIF---E-EVPIALRLSSHMLLGGVRIYSRKKAKVLLA : 76
Seminavis_robusta_Rad21 : MFVSIHLAK-KGPI---GKIVWLAHW---DKKIKRKNQVADTDIGVSVDSLIF---E-EVPIALRLSSHMLLGGVRIYSRKKAKVLLA : 76
mf gp w aa p alr s l g r

```

```

Arabidopsis_thaliana_Rec8_(SYN1) : -DVNRF-----VEENGAIRTKS----- : 93
Oryza_sativa_Rec8 : SDCVRS---SQMLRSTRHGG-----SSQSQTTPPYFPAKPKPSIVSERYM : 125
Oryza_sativa_Rad21-4/Rec8 : -DVSRLF-----IEENEARVVKP----- : 93
Homo_sapiens_Rec8 : -DIQHIL-----ERHRAQLRIR-----IDM-----ETE---LPSILLPNHLLAMMETLE : 130
Mus_musculus_Rec8 : -DIQHIL-----EHHRAQLRIR-----IDM-----EEADLPSILLNCLAMMETLE : 131
Schizosaccharomyces_pombe_Rec8 : -QVSTLH-----LRVRKELDHT-----SKFFNNDIQNEQTNPKQLL : 119
Sordaria_macrospora_Rec8 : -DAEKIH-----MHVRCFNVVLG-----GSGNAL-----DPQAGKAKRNQLIPDDPN---FEV : 127
Neurospora_crassa_Rec8 : -DAEKIH-----MHVRCFNVVLG-----GSGNAL-----DPQAGKAKRNQLIPDDPN---FEV : 127
Arabidopsis_thaliana_Rad21 : -DCNKAL-----IGKKEFVAKER---NREKTGVSL---PASIECFSIAPERFELDAPFDL : 125
Oryza_sativa_Rad21 : -VCSEAL-----LTKKQARSTA-----VDL-----PPEESTAPYHSITLPETFHLDFF-- : 119
Ricinus_communis_Rad21 : -DCNVVL-----VGRKATTSIE-----VNL-----PENATTAKFESVITLPTFDLDALDV : 121
Theobroma_cacao_Rad21 : -DCNIVL-----IGHRKVFASVQ-----VDL-----PEDARQAFPQAITPQTFNLDAMEL : 121
Zea_mays_Rad21 : -DCSEAL-----LTKKQARSTA-----VDL-----PPEESTAPYHSITLPETFHLDFF-- : 119
Arabidopsis_thaliana_Rad21-3 : -DWNLLN-----TWAKAVVSTQ-----VNL-----PEDARQAPPESVTLPEQALNLDPEFL : 121
Arabidopsis_thaliana_Rad21-4 : -DCSEAL-----LTKKQARSTA-----VDL-----PPEESTAPYHSITLPETFHLDPEFL : 121
Oryza_sativa_Rad21-2 : -EONELLSYGSYSAHCNELSIPGGATNRVSKQAKKPVRRARLVVRQEGAYKVKIPMQAVRTTRAETRATSQITEVRDTHATPDLPFTPKRFELSDFDL : 177
Oryza_sativa_Rad21-3 : -DCNRML-----STRTAFASVQ-----VDL-----PLHADHAFDITITPDTFRLLDINL : 121
Homo_sapiens_Rad21 : -DCNEAF-----IKKMAFRPGV-----VDL-----PEENREAAYNAILPEEFHDF--- : 117
Mus_musculus_Rad21 : -DCNEAF-----IKKMAFRPGV-----VDL-----PEENREAAYNAILPEEFHDF--- : 117
Danio_rerio_Rad21 : -DCNEAF-----IKKMAFRPGV-----VDL-----PEDNREAAYNAILPEEFHDF--- : 117
Xenopus_(Silurana)_tropicalis_Rad21 : -DCNEAF-----IKKMAFRPGV-----VDL-----PEENREAAYNAILPEEFHDF--- : 117
Drosophila_melanogaster_Rad21 : -DCNEAF-----VKKMAFRPGM-----VDL-----PEGHREANVNAITPEVFHDF--- : 117
Caenorhabditis_elegans_Rad21 : -DTNEAY-----QKVKINRNGF-----SFEVDIPENAELEEDFSNFIDKY : 116
Schizosaccharomyces_pombe_Rad21 : -DCTEAL-----MRKMSVQPGQVDMIEPATLQSTL---KGDVAVTQSANLTPETITEFD--L : 130
Sordaria_macrospora_Rad21 : -DCNEAL-----MKKMAFRSTG-----NNDI-----PTNLHVQNSLSLMDQDITPYDNL : 123
Neurospora_crassa_Rad21 : -DCNEAL-----MKKMAFRSTG-----NNDI-----PTNLHVQNSLSLMDQDITPYDNL : 123
Aspergillus_niger_Rad21 : -DCNEAL-----MKKMAFRSTG-----NNDI-----TTTVVAPGGITLFDVLTESDLFM : 121
Thalassiosira_pseudonana_Rad21 : -DCHEAM-----VTKMAFRPEGVNSMGGKGGEGMVVVMDPNQIKGKRGEGGDSGNVDRFGEFYTDMDAGPLGGML : 153
Phaeodactylum_tricornutum_Rad21 : -DCHEAM-----VTKMAFRPSQ-----EKNAAIDILSNLKESSNMN : 113
Fragilariopsis_cylindrus_Rad21 : -DCTEAM-----LTKQMAFTTK-----QVGDKEGSSRELLSEKDAFPMHQL : 117
Pseudo-nitzschia_multiseriata_Rad21 : -KSN----- : 33
Pseudo-nitzschia_multiseriata_Rad21 : -DCTEAM-----LTKQMAFCNQA-----GGGKLG-----RLDEHGKPVGRGELSEKDAFPMHQL : 126
Seminavis_robusta_Rad21 : -DCTEAM-----VTKMAFRNDAKNDGKSNNSNNS-----NPNNTNSIDLVIIGDTPKGGATTVN : 131

```

```

*           220           *           240           *           260           *           280           *           300
Arabidopsis_thaliana_Rec8_(SYN1) : -VPDPTL-----LPGKTHARK--EAVTLPE----- : 116
Oryza_sativa_Rec8 : LYGDEHLT-----FSWVSVTGAKGAGLRAVWYEAVTLPE-----NIM-- : 162
Oryza_sativa_Rad21-4/Rec8 : -VADPTV-----LPGKTKQAKY--EAVTLPE-----NIM-- : 119
Homo_sapiens_Rec8 : DAPDPFFG---M---MSVDPR-----LPSP-FDIP---QIRHL--LEAATPE----- : 165
Mus_musculus_Rec8 : DAPEPFFGK-----MSVDPR-----LPSP-FDIP---QIRHL--LEAATPE----- : 166
Schizosaccharomyces_pombe_Rec8 : LAEDPAF-----IP-----EVSLEY--DAFNLS-----V--- : 141
Sordaria_macrospora_Rec8 : NMGLPAFH-----FDEEGNLAQ---FQSQ-ASRKTSSQFSPL--DRFNLTPE-----DGNGSPIT-- : 176
Neurospora_crassa_Rec8 : NMGLPAFR-----LDEDEGNLAL--FQSQ-ASCKTSSQFSPL--DKFNLTPE-----DGSGSPLL-- : 176
Arabidopsis_thaliana_Rad21 : GVLEDFHGGNVKPHEDITLKDGSGQETERMDMYSMERFDMEEDLLTFH--ETSTNHNENKHE-----FAHDMELDAENVRDTTEA--- : 206
Oryza_sativa_Rad21 : ELPEAAFQGDIDHHVSTKEQITLQDNPEKTGYSTSQFGLDERFGDGNSSHIGLLEBELMLNKD-----QSIQLEADDGIIQGRSAVHPT : 205
Ricinus_communis_Rad21 : DFDIDAYG-----SPDNHMRSQ--EETLQD-----EVSLEY--DAFNLS-----V--- : 155
Theobroma_cacao_Rad21 : DGDMC-----TEGSSDNHLSNQ--EDITLTD-----QIPIGGDPYV-- : 155
Zea_mays_Rad21 : ELPEAAFQGDIDHHVSTKEQITLQDNPEKTGYSTSQFGLDERFGDGNSSHIGLLEBELMLNKD-----HSIHLQSDGIIQGRSSVPST : 205
Arabidopsis_thaliana_Rad21-3 : EDDTLME-----FDNHRSEEDITLTD-----QIPTGIDPYV-- : 154
Arabidopsis_thaliana_Rad21-4 : PDNEIFQGNVDDHHVSTKEQITLQDMDGVVYSTSQFGLDERFGDGNSSHIGLLEBELMLNKD-----QIPTDRDPYV-- : 155
Oryza_sativa_Rad21-2 : GIPEDRDD-----DDVDHQLP---HQGTMLEDENHHTSCLF--ESYKMMTCSYADLD-----SACIMPVVRTIPTEMMSVT-- : 244
Oryza_sativa_Rad21-3 : DDAIRLID-----TPDNHRKSL--DQITLAE-----GDIY-- : 149
Homo_sapiens_Rad21 : DQPLPLDD-----IDVAQQFSLNQSRVEEITMRE-----EVGNISI-- : 154
Mus_musculus_Rad21 : DQPLPLDD-----IDVAQQFSLNQSRVEEITMRE-----EVGNISI-- : 154
Danio_rerio_Rad21 : DQPLPLDD-----IDVAQQFSLNQSRVEEITMRE-----EVGNISI-- : 154
Xenopus_(Silurana)_tropicalis_Rad21 : DQPLPLDD-----IDVAQQFSLNQSRVEEITMRE-----EVSNINT-- : 154
Drosophila_melanogaster_Rad21 : DTALPELN---D---IDMEAQ---FSI-----NQSRA--DEITMRE-----DYGSI-- : 152
Caenorhabditis_elegans_Rad21 : NITVPEF-----HDADYNEQLIMANVSRR--EDITMKE-----TVNFNVEF-- : 155
Schizosaccharomyces_pombe_Rad21 : LVPDSTFD-----FQWSQL---L RTP-SRSSNTLELHSL--PISSSPS-----FPSSQL-- : 173
Sordaria_macrospora_Rad21 : LLPPPSADY-----LASQIEEVTGAPIMARK--VQVRASQ-----RDINL-- : 161
Neurospora_crassa_Rad21 : LLPPPSADY-----LASQIEEVTGAPIMARK--VQVRASQ-----RDINL-- : 161
Aspergillus_niger_Rad21 : NLDSSLL-----LPQTLNLEP---EGKRPGS----- : 144
Thalassiosira_pseudonana_Rad21 : VEVVLMDFND-D---LNDVGGGALGGGAFAP-FSLDPAGNTGEG--ENWIVAD-----EDGDDASTTAGRGRNR-- : 217
Phaeodactylum_tricornutum_Rad21 : VANFGEYHEVVFE---ITDAPT---FQLP-FEINDDAAA---EDVVPAD-----LDETHE-- : 159
Fragilariopsis_cylindrus_Rad21 : VSNFGEYDQ-----VHIVEG---FCLP-----LEPD--NEWILAE-----DDED-- : 152
Pseudo-nitzschia_multiseriata_Rad21 : ----- : -
Pseudo-nitzschia_multiseriata_Rad21 : VSNFGEYDQ-----IHVVEG---FCLPLPEDN---EWILAE-----DEAGIGGGSV-- : 166
Seminavis_robusta_Rad21 : NSNFGEYQDFLLDPNAIVDDGDGATG---FAVP-VDLNEMTEQELA--ERWVLAEQHQHQQQQ---QSQNTQERMNHESQSTTT-- : 207

```

```

*           320           *           340           *           360           *           380           *           400
Arabidopsis_thaliana_Rec8_(SYN1) : ---NEEADFGDPE-----QTRNV : 131
Oryza_sativa_Rec8 : DMVDEQPMLFSEA-----DTRFR : 180
Oryza_sativa_Rad21-4/Rec8 : DMVDEQPMLFSEA-----D : 133
Homo_sapiens_Rec8 : ---RVEEIPPEVP-----TEPRE : 180
Mus_musculus_Rec8 : --KTRKETLPEAT-----PDPRK : 182
Schizosaccharomyces_pombe_Rec8 : DLHVMSSFTQPK-----EN : 156
Sordaria_macrospora_Rec8 : GLDLPQSSFTNPL-----YS : 191
Neurospora_crassa_Rec8 : GLDLPQSSPADPL-----YS : 191
Arabidopsis_thaliana_Rad21 : SVRVVEAEPLDSN-----EPSRD : 224
Oryza_sativa_Rad21 : DMEVDDNQNKDES---AEGYNMEDGPPSHNKLNPLSADGLVGNLSLNPWHTYVQTPDLNMDLLNNDGNAGPSASYQPSFPFCDEPASPEFVSA-QAPAT : 301
Ricinus_communis_Rad21 : VTSFDEEDVMMDTL-----PPE : 171
Theobroma_cacao_Rad21 : AITFDEDIMRDAS-----L : 169
Zea_mays_Rad21 : DMDIDDNKSQDIIAEGYHNMDGGHSSHGKGLSLNLAIDLGGNSIPNWTGYNVHTPDLNLDILLHNEGIAGPSASYIQPSPYTCDEPASPEFISA-QAPAT : 304
Arabidopsis_thaliana_Rad21-3 : AVTFDEEDIISESI-----PMD : 170
Arabidopsis_thaliana_Rad21-4 : PMDFNEEQVEILA-----MNEFIEDAQAPQTPGLVEVPNSSSVREQMACDDHMDVEDLNA : 277
Oryza_sativa_Rad21-2 : SEVNSLLCLSSIG-----GEPENH : 263
Oryza_sativa_Rad21-3 : MIDLDEEDARVELS-----A : 163
Homo_sapiens_Rad21 : ---LQENDFGDFG-----MDD : 167
Mus_musculus_Rad21 : ---LQENDFGDFG-----MDD : 167
Danio_rerio_Rad21 : ---MTDNDFGDFG-----MDD : 167
Xenopus_(Silurana)_tropicalis_Rad21 : ---LQDNDFGDFG-----MDD : 167
Drosophila_melanogaster_Rad21 : SLSLQDDGFGDIG-----FEAET : 170
Caenorhabditis_elegans_Rad21 : NIDADFDGFGDEG-----ESWQL : 173
Schizosaccharomyces_pombe_Rad21 : SIEAGRNAQVESG-----FSL : 189
Sordaria_macrospora_Rad21 : QEDFNNSQFLNNT-----MV : 176
Neurospora_crassa_Rad21 : QEDFNNSQFLNNT-----MI : 176
Aspergillus_niger_Rad21 : SMDFGSQLPDTG-----LRR : 160
Thalassiosira_pseudonana_Rad21 : GRDKKSTLSSNAA-----ANLTL : 235
Phaeodactylum_tricornutum_Rad21 : IVTGLQAEELGEYG-----SPRD : 176
Fragilariopsis_cylindrus_Rad21 : EVPQEQLHLVAAA-----VGQ : 168
Pseudo-nitzschia_multiseriata_Rad21 : -LTTDDTDPTMAN----- : 45
Pseudo-nitzschia_multiseriata_Rad21 : GEASQELLLAAHL-----PRK : 182
Seminavis_robusta_Rad21 : QQQTEEDSPNEWS-----F : 221

```



|                                     | * | 620                                                   | *    | 640                                                                            | *       | 660                                        | *    | 680                     | *    | 700  |       |
|-------------------------------------|---|-------------------------------------------------------|------|--------------------------------------------------------------------------------|---------|--------------------------------------------|------|-------------------------|------|------|-------|
| Arabidopsis_thaliana_Rec8_(SYN1)    | : | ---NPREGAE---                                         | ---- | IPPTLLIPSPRRHDIPE---                                                           | GVNP--- | TSPQRQEQQENRRDGFQAEQMEE---                 | ---- | QNI-----                | ---- | ---- | : 262 |
| Oryza_sativa_Rec8                   | : | ---TPDGHQ---                                          | ---- | VPSNLVSPSPRQEDSPQQENHHAA---                                                    | ----    | SSPLHHEAQGGQF---                           | ---- | ----                    | ---- | ---- | : 304 |
| Oryza_sativa_Rad21-4/Rec8           | : | ---TPDGHQ---                                          | ---- | VPSNLVSPSPRQEDSPQQENHHAA---                                                    | ----    | SSPLHHEAQGGASVKNEEQQ---                    | ---- | ----                    | ---- | ---- | : 260 |
| Homo_sapiens_Rec8                   | : | ---EAAILLE---                                         | ---- | IPRLPPPAEVEGIGE---                                                             | ----    | ALGPPEELRLTGWEPGALLMEV---                  | ---- | ----                    | ---- | ---- | : 275 |
| Mus_musculus_Rec8                   | : | ---ALEGAGL---                                         | ---- | VSALSPPAPAQVEGIGQ---                                                           | ALPG--- | QVFPPEVQKMTGWEPGALLTEV---                  | ---- | ----                    | ---- | ---- | : 314 |
| Schizosaccharomyces_pombe_Rec8      | : | ---NGDIQEL---                                         | ---- | TKGTINSDFSLQAASQH---                                                           | SNL---  | GSVQREYNSEEQESRRHMFED---                   | ---- | ----                    | ---- | ---- | : 257 |
| Sordaria_macrospora_Rec8            | : | ---QDQLLIN---                                         | ---- | GGTAPPPEADDEVPLG---                                                            | ----    | VPDQVEQAQENQVMAEAEQQ---                    | ---- | VIA-----                | ---- | ---- | : 320 |
| Neurospora_crassa_Rec8              | : | ---QGDLLMS---                                         | ---- | GGTAPPPEADDEVPLG---                                                            | ----    | VPDQVEQAQEDQLMEDVVEAQ---                   | ---- | VI-----                 | ---- | ---- | : 319 |
| Arabidopsis_thaliana_Rad21          | : | ---MSTLEKP---                                         | ---- | EPVSVTGRDLQEGVEKCRDHNEAEMADFELPHGSHKEQSETSEVNLHGSEKGLFSDMTVSKDP---             | ----    | ----                                       | ---- | ----                    | ---- | ---- | : 412 |
| Oryza_sativa_Rad21                  | : | ---SNDIPSD---                                         | ---- | LPTLEFPEREKMLSAVDVLYQANDLQGVTAEKGTESDGSNKVGLTSRKRHLEDLSLPALESATTEKLSSRRPRGK--- | ----    | ----                                       | ---- | ----                    | ---- | ---- | : 562 |
| Ricinus_communis_Rad21              | : | ---LRDHVDFSS---                                       | ---- | NLPVFTHQQNDASEPNISLDQGLNEKKTSPFPKEDVIPSGGQSSFPQQRSESPNSASRDAPGIFDHSI---        | ----    | ----                                       | ---- | ----                    | ---- | ---- | : 357 |
| Theobroma_cacao_Rad21               | : | ---RDAPRDFYTN---                                      | ---- | LPPVFSDRHNDTPMTGTLEEVLNE---                                                    | ----    | KEAHTPSLNMLASGVSPMPFQOHSDDPPTSAVSKGP---    | ---- | ----                    | ---- | ---- | : 314 |
| Zea_mays_Rad21                      | : | ---QVVASNDRLNE---                                     | ---- | LATSEFAEPEKMLSVPDSEFNHPIDLGLITAEKGTESDGSNIIGLSAKRKHLEDLSLPALESETTERLSSRPHGI--- | ----    | ----                                       | ---- | ----                    | ---- | ---- | : 564 |
| Arabidopsis_thaliana_Rad21-3        | : | ---RDAADHL---                                         | ---- | SPTSHPSFAAQDQVVRVERTESELDTELNEKEPTIPSIDEMLNSGRHSFELRSGSPGSAAGSE---             | ----    | ----                                       | ---- | ----                    | ---- | ---- | : 327 |
| Arabidopsis_thaliana_Rad21-4        | : | ---PDGQLNNAHETDEQLGNLTGFTDSDFPPEKVLAVPNRQDGDNDFMVE--- | ---- | STPKDEPDTGTCNDAGNNTGKRRFTTESTLTAESLNSVESVGLIQ---                               | ----    | ----                                       | ---- | ----                    | ---- | ---- | : 506 |
| Oryza_sativa_Rad21-2                | : | ---NGSLHGT---                                         | ---- | NTNPSDCDGFEEPGSLEQ---                                                          | PTL---  | RCKTKLINELSPSTPEPMTTEGGTGLPCSPKFMVTT---    | ---- | ----                    | ---- | ---- | : 413 |
| Oryza_sativa_Rad21-3                | : | ---KNITPPA---                                         | ---- | LERTISPGQGLSGTSPINARGSTS---                                                    | ----    | TTYDNIQDVIEMDIPMDIEMDPRLEPSPRPVQDEMNQAQ--- | ---- | ----                    | ---- | ---- | : 329 |
| Homo_sapiens_Rad21                  | : | ---NDGGIFD---                                         | ---- | DDPALSEAGVMLPEQPAHDDMDEDDNDSVSMGPPSDPSVDVPEFMPTMTDQTTLLVNE---                  | ----    | ----                                       | ---- | ----                    | ---- | ---- | : 300 |
| Mus_musculus_Rad21                  | : | ---NDGGIFD---                                         | ---- | DDPALSEAGVMLPEQPAHDDMDEDDNDSVSMGPPSDPSVDVPEFMPTMTDQTTLLVNE---                  | ----    | ----                                       | ---- | ----                    | ---- | ---- | : 300 |
| Danio_rerio_Rad21                   | : | ---EDGGGIF---                                         | ---- | DDPPAITSVMMQDQHGDDDDDFDNFSPAGGPDSPDGGVPEPLNPTDQTDQTEQTTLLVNEDE---              | ----    | ----                                       | ---- | ----                    | ---- | ---- | : 303 |
| Xenopus_(Silurana)_tropicalis_Rad21 | : | ---DAGGIFD---                                         | ---- | DDPPAIEEGVAMPEQPVHDDDDDDNDSVSMGAPSDPSVDVPEFMPTMTDQTTLLVNE---                   | ----    | ----                                       | ---- | ----                    | ---- | ---- | : 298 |
| Drosophila_melanogaster_Rad21       | : | ---DEDAIDN---                                         | ---- | IHNVPSPATSLVNSIED---                                                           | EKEE--- | NNLNHGASVSENVFMEITLVQ---                   | ---- | NE-----                 | ---- | ---- | : 309 |
| Caenorhabditis_elegans_Rad21        | : | ---DGGVGA---                                          | ---- | DMFSSMIHPVREHAVADVQNDGDMDFD---                                                 | ----    | YQFPFENVEPSRPS---                          | ---- | ----                    | ---- | ---- | : 304 |
| Schizosaccharomyces_pombe_Rad21     | : | ---GGTSLDD---                                         | ---- | ELLAPVDDLNLDLGLDLDLGDDEQGA---                                                  | ----    | NAPAIEADEQAETSSTHPSIDIMEDDSSRPAAGV---      | ---- | ----                    | ---- | ---- | : 335 |
| Sordaria_macrospora_Rad21           | : | ---GVRIHDD---                                         | ---- | EGDIQMGGDLDQFHVGDHSEIPEGL---                                                   | ----    | STPGAPDMARARISESPLSDIDDFEFAKEVEQYSRH---    | ---- | ----                    | ---- | ---- | : 322 |
| Neurospora_crassa_Rad21             | : | ---GVRHADD---                                         | ---- | EGDIQMGGDLDQFNVADHSEIPEGL---                                                   | ----    | STPGAPDMARARISESPLSDIDDFEFAKEVEQYSRH---    | ---- | ----                    | ---- | ---- | : 322 |
| Aspergillus_niger_Rad21             | : | ---MDLGGDA---                                         | ---- | LPNLLQTDAMDLDGDDHDE---                                                         | ----    | PAPNADELERESALSSMADDDLDLLEKSQAFELD---      | ---- | ----                    | ---- | ---- | : 296 |
| Thalassiosira_pseudonana_Rad21      | : | ---QDHGDI---                                          | ---- | FDVDTSGQPKVSGGLGSLVDSKDBE---                                                   | ----    | SLEHRRHSDLGLSLEISGLDEE---                  | ---- | GSE-----                | ---- | ---- | : 392 |
| Phaeodactylum_tricornutum_Rad21     | : | ---QNEFPIA---                                         | ---- | DDTEMI PDDEDDTRHDIRNASLNL---                                                   | ----    | SVSRDGSAGNATVAIGGLDSDQ---                  | ---- | DSA-----                | ---- | ---- | : 327 |
| Fragilariopsis_cylindrus_Rad21      | : | ---GGENPDD---                                         | ---- | YDFNVFPDDDESEDEQGVDPDTAGD---                                                   | ----    | GGGLNLDLSDRGGTPGGNNSVANMSGLAMDDDDSA---     | ---- | ----                    | ---- | ---- | : 322 |
| Pseudo-nitzschia_multiseriata_Rad21 | : | ---ADCRGL---                                          | ---- | AAAAAPLDDSLQSR---                                                              | ----    | DG---                                      | ---- | GTPLSKGNADALLGLSMDAS--- | ---- | ---- | : 125 |
| Pseudo-nitzschia_multiseriata_Rad21 | : | ---TNPQED---                                          | ---- | YDFTVFPGEDSDADBPVATRLSD---                                                     | ----    | AGLGSALQLSRDGGTPLSTGNAGLGLGLDADEDS---      | ---- | ----                    | ---- | ---- | : 346 |
| Seminavis_robusta_Rad21             | : | ---APPATPGMSE---                                      | ---- | ASFPFPGDDDVAAMQIPLGDVDDDDNAAVNNDEENAGDLFSKSDSTGGGAAYGLDES---                   | ----    | ----                                       | ---- | ----                    | ---- | ---- | : 415 |

|                                     | * | 720                                           | *    | 740                                         | *     | 760     | *    | 780                                 | *    | 800  |       |
|-------------------------------------|---|-----------------------------------------------|------|---------------------------------------------|-------|---------|------|-------------------------------------|------|------|-------|
| Arabidopsis_thaliana_Rec8_(SYN1)    | : | ---PD---                                      | ---- | KEEHRDPQPAKK---                             | ----  | RRR---  | ---- | TATSAMDYEQTIAGHVYQSWIQ---           | ---- | ---- | : 303 |
| Oryza_sativa_Rec8                   | : | ---KHMGGQPAKSSKRR---                          | ---- | RRR---                                      | ----  | RRR---  | ---- | DDEVVMDNDQIMPGNVYQTWIK---           | ---- | ---- | : 345 |
| Oryza_sativa_Rad21-4/Rec8           | : | ---KHMGGQPAKSSKRR---                          | ---- | RRR---                                      | ----  | RRR---  | ---- | DDEVVMDNDQIMPGNVYQTWIK---           | ---- | ---- | : 301 |
| Homo_sapiens_Rec8                   | : | ---PE---                                      | ---- | ELRLPAPPSPERRPPV---                         | PP--- | PP---   | ---- | RRRLFWKKTQISPEKPEQEQ---             | ---- | ---- | : 324 |
| Mus_musculus_Rec8                   | : | ---PQ---                                      | ---- | ELRLPAPPSPTEKRLPSLQRLP---                   | ----  | RRR---  | ---- | RRRLFWKKTQISPEKPEQEQ---             | ---- | ---- | : 365 |
| Schizosaccharomyces_pombe_Rec8      | : | ---ED---                                      | ---- | VLPVLPVLSQVSMDSHNEPR---                     | AL--- | RRR---  | ---- | VOKLEPPEENIESTRTESSQWRK---          | ---- | ---- | : 310 |
| Sordaria_macrospora_Rec8            | : | ---EE---                                      | ---- | EPVAEASAAPVR---                             | ----  | RRR---  | ---- | RRVVAPEEDTKSRHELKSWSN---            | ---- | ---- | : 361 |
| Neurospora_crassa_Rec8              | : | ---AE---                                      | ---- | EPVVEAVAAPVQ---                             | ----  | RRR---  | ---- | RRVVAPEEDTKSRHELKSWSN---            | ---- | ---- | : 360 |
| Arabidopsis_thaliana_Rad21          | : | ---SS---                                      | ---- | EFNATDTPVTPTKPSRLKISEGGTSPQFSIPTPAKESVSE--- | ----  | VSE---  | ---- | RRKCLIDS-EVIEPNKVMKEMIE---          | ---- | ---- | : 482 |
| Oryza_sativa_Rad21                  | : | RTIDGIPDDDDLLASILVGRRTPGRLDSTPIPKTSSLKRRLT--- | ---- | SK---                                       | ----  | STTP--- | ---- | RRKVQMD-AMVHADTIRQOLI---            | ---- | ---- | : 635 |
| Ricinus_communis_Rad21              | : | ---SFGRVSPELAIRSTPAVQQP---                    | ---- | RRR---                                      | ----  | RRR---  | ---- | RRKHFFFEATVTKNFKMKALE---            | ---- | ---- | : 404 |
| Theobroma_cacao_Rad21               | : | ---PEV---                                     | ---- | SFGCASPOLVQSPVPPVQPP---                     | ----  | RRR---  | ---- | IPRRRFFEKLVNPNRLMKRALE---           | ---- | ---- | : 364 |
| Zea_mays_Rad21                      | : | RTNDFVPHDDLLASILVGRRTPGRLDSTPLPRESSL---       | ---- | RRR---                                      | ----  | RRR---  | ---- | RRRGLGSKMGTLRKVQID-AMVHADTIRQOLI--- | ---- | ---- | : 637 |
| Arabidopsis_thaliana_Rad21-3        | : | ---EERA---                                    | ---- | DFVHSPQVLQPSPPPQ---                         | ----  | RRR---  | ---- | ARRKNEFGVTVTKNKSERLK---             | ---- | ---- | : 376 |
| Arabidopsis_thaliana_Rad21-4        | : | SKRTADSVPPDDDDLLSSILVKGSSFLKMRPTVLEPATT---    | ---- | RRR---                                      | ----  | RRR---  | ---- | RRLSAPRSTATRRKVMDS-PMVHGDITRQOLT--- | ---- | ---- | : 579 |
| Oryza_sativa_Rad21-2                | : | ---PA---                                      | ---- | KKEKRRVTRKRRRGLYNKDYIPTDRGDKR---            | ----  | VVR---  | ---- | RGTWLYYENIVPNETLRNTE---             | ---- | ---- | : 471 |
| Oryza_sativa_Rad21-3                | : | ---PVQ---                                     | ---- | GEINAQPVQDEMNAPVQDEMN---                    | ----  | AH---   | ---- | RRRIRYDN-EIVFSNAYMKROID---          | ---- | ---- | : 382 |
| Homo_sapiens_Rad21                  | : | ---EE---                                      | ---- | AFALEPIDITVKET---                           | ----  | RRR---  | ---- | RRKLIVDS-VKE-DSKTIQAOLS---          | ---- | ---- | : 342 |
| Mus_musculus_Rad21                  | : | ---EE---                                      | ---- | AFALEPIDITVKET---                           | ----  | RRR---  | ---- | RRKLIVDS-VKE-DSKTIQAOLS---          | ---- | ---- | : 342 |
| Danio_rerio_Rad21                   | : | ---EE---                                      | ---- | AFALEPIDITVKET---                           | ----  | RRR---  | ---- | RRKLIVDS-LKE-DSKTIQAOLS---          | ---- | ---- | : 343 |
| Xenopus_(Silurana)_tropicalis_Rad21 | : | ---EE---                                      | ---- | AFALEPIDITVKET---                           | ----  | RRR---  | ---- | RRKLIVDS-VKE-DSKTIQAOLS---          | ---- | ---- | : 340 |
| Drosophila_melanogaster_Rad21       | : | ---DE---                                      | ---- | GFALAPLDSVMYKGV---                          | ----  | RRR---  | ---- | RRKLIVDE-IKNISGEMKQAOLA---          | ---- | ---- | : 353 |
| Caenorhabditis_elegans_Rad21        | : | ---PE---                                      | ---- | SFALEPLDVEHMEGRK---                         | ----  | RRR---  | ---- | RRKLIV-AETMSNDAPREQQE---            | ---- | ---- | : 349 |
| Schizosaccharomyces_pombe_Rad21     | : | ---EE---                                      | ---- | SQVVESATAPQOEKINPQ---                       | ----  | RRR---  | ---- | RRRATIDP-VTESSQMKKOLA---            | ---- | ---- | : 381 |
| Sordaria_macrospora_Rad21           | : | ---SN---                                      | ---- | SDMYEPGEDPTASTIIAP---                       | ----  | RRR---  | ---- | RRKLIVPEEQTMSNAQIKQQS---            | ---- | ---- | : 369 |
| Neurospora_crassa_Rad21             | : | ---NN---                                      | ---- | SDMYEPGEDPTASTIIAP---                       | ----  | RRR---  | ---- | RRKLIVPEEQTMSNAQIKQQS---            | ---- | ---- | : 369 |
| Aspergillus_niger_Rad21             | : | ---VN---                                      | ---- | DVNDDEDEVTAHQAP---                          | ----  | RRR---  | ---- | RRKLIV-LALKEKTDQKVDVREQYL---        | ---- | ---- | : 341 |
| Thalassiosira_pseudonana_Rad21      | : | ---GQ---                                      | ---- | KKRKRGKETGPK---                             | ----  | RRR---  | ---- | RRKLIV-NMTE-SGEHMRSMUR---           | ---- | ---- | : 432 |
| Phaeodactylum_tricornutum_Rad21     | : | ---VK---                                      | ---- | GSVGNKRASVAP---                             | ----  | RRR---  | ---- | RRKVVDDDDTEPNKHKRMDLA---            | ---- | ---- | : 370 |
| Fragilariopsis_cylindrus_Rad21      | : | ---TQ---                                      | ---- | ASAANKRPHHEKKP---                           | ----  | RRR---  | ---- | RRKVVDDNATE-TTEHHRDMK---            | ---- | ---- | : 367 |
| Pseudo-nitzschia_multiseriata_Rad21 | : | ---QQ---                                      | ---- | QMOMQPPSAAAAATTK---                         | P---  | RRR---  | ---- | RRKVVDDNHETE-TNDHIRGDMK---          | ---- | ---- | : 173 |
| Pseudo-nitzschia_multiseriata_Rad21 | : | ---AGNA---                                    | ---- | GGLSDPSKREQLQREEPKPPP---                    | ----  | RRR---  | ---- | RRKVVDDNHETE-TNDHIRGDMK---          | ---- | ---- | : 401 |
| Seminavis_robusta_Rad21             | : | ---PA---                                      | ---- | RPAQSVSDEDEEEKPKKRRTRQEGPK---               | ----  | RRR---  | ---- | RRKVVDDNHETE-TNDHIRGDMK---          | ---- | ---- | : 473 |

|                                     | * | 820                | *    | 840   | *     | 860                                                                             | *     | 880   | *     | 900   |       |
|-------------------------------------|---|--------------------|------|-------|-------|---------------------------------------------------------------------------------|-------|-------|-------|-------|-------|
| Arabidopsis_thaliana_Rec8_(SYN1)    | : | DTS--DILCRGEKRRKVR | ---- | ----- | ----- | GTIRPDMESFKRAN                                                                  | ----- | ----- | ----- | ----- | : 332 |
| Oryza_sativa_Rec8                   | : | DPS--SITTKRRHRINSK | ---- | ----- | ----- | VNLIKRSIKIRDLMD                                                                 | ----- | ----- | ----- | ----- | : 374 |
| Oryza_sativa_Rad21-4/Rec8           | : | DPS--SITTKRRHRINSK | ---- | ----- | ----- | VNLIKRSIKIRDLMD                                                                 | ----- | ----- | ----- | ----- | : 330 |
| Homo_sapiens_Rec8                   | : | TRA--HCWECPMVQPEE  | ---- | ----- | ----- | RTI                                                                             | ----- | ----- | ----- | ----- | : 342 |
| Mus_musculus_Rec8                   | : | TGA--HCWEYPPVAQPK  | ---- | ----- | ----- | RML                                                                             | ----- | ----- | ----- | ----- | : 383 |
| Schizosaccharomyces_pombe_Rec8      | : | NYVERMIALEAT       | ---- | ----- | ----- | KYVRRRGASSAKK                                                                   | ----- | ----- | ----- | ----- | : 335 |
| Sordaria_macrospora_Rec8            | : | D--YANAERTNNA      | ---- | ----- | ----- | RRAAATNPAAAKKHAYDLVFGRGVGVGVSFDDGLNSGNHRS                                       | ----- | ----- | ----- | ----- | : 415 |
| Neurospora_crassa_Rec8              | : | N--YANAERANNA      | ---- | ----- | ----- | VRGAAMNPTTAKKHAYELIFGRGVGVGVALESGLNSENHRS                                       | ----- | ----- | ----- | ----- | : 414 |
| Arabidopsis_thaliana_Rad21          | : | DSS--KLLAKRRNVFHT  | ---- | ----- | ----- | DCPERRTKRFA                                                                     | ----- | ----- | ----- | ----- | : 508 |
| Oryza_sativa_Rad21                  | : | STE--DILRRIRKKAPCT | ---- | ----- | ----- | RSEIWMIEKGSLEDDIFHEPIFSCMKCELNDLQ                                               | ----- | ----- | ----- | ----- | : 683 |
| Ricinus_communis_Rad21              | : | NSK--DILRRKRREIPST | ---- | ----- | ----- | ALGIWKLNRNSLRKEQVLSEPLLTGSC                                                     | ----- | ----- | ----- | ----- | : 445 |
| Theobroma_cacao_Rad21               | : | DCS--DILVRKRRKLPSS | ---- | ----- | ----- | ALGVWKLNC                                                                       | ----- | ----- | ----- | ----- | : 389 |
| Zea_mays_Rad21                      | : | NTE--DILRRIRKKAPCT | ---- | ----- | ----- | RSEIWMIEKGSLEDDIFHEPIFSCLEELNKLHNRTYEAIVHPAVQNMELQGGQL                          | ----- | ----- | ----- | ----- | : 706 |
| Arabidopsis_thaliana_Rad21-3        | : | DPS--DILRRKRKMPSS  | ---- | ----- | ----- | KLKFWRMNNQSRKD                                                                  | ----- | ----- | ----- | ----- | : 405 |
| Arabidopsis_thaliana_Rad21-4        | : | NTE--DILRRVRKKAPCT | ---- | ----- | ----- | VPEIVMLQRQALEDGLFKPEIFTGMSVELVSLHTEPYDLRG                                       | ----- | ----- | ----- | ----- | : 635 |
| Oryza_sativa_Rad21-2                | : | DAS--DILVQQRKAPHT  | ---- | ----- | ----- | CLYTWKEGKIR                                                                     | ----- | ----- | ----- | ----- | : 497 |
| Oryza_sativa_Rad21-3                | : | GSELHRTVSKRRKLLQA  | ---- | ----- | ----- | AVDVWKFNRIRQKDGFLDPLVHGM                                                        | ----- | ----- | ----- | ----- | : 425 |
| Homo_sapiens_Rad21                  | : | DYS--DILVTTLDLAPPT | ---- | ----- | ----- | KKLMWVKETGGVEKLF                                                                | ----- | ----- | ----- | ----- | : 374 |
| Mus_musculus_Rad21                  | : | DYS--DILVTTLDLAPPT | ---- | ----- | ----- | KKLMWVKETGGVEKLF                                                                | ----- | ----- | ----- | ----- | : 374 |
| Danio_riero_Rad21                   | : | DYS--DILVTTLDLAPPT | ---- | ----- | ----- | KKLMWVKETGGVEKLF                                                                | ----- | ----- | ----- | ----- | : 375 |
| Xenopus_(Silurana)_tropicalis_Rad21 | : | DYS--DILVTTLDLAPPT | ---- | ----- | ----- | KKLMWVKETGGVEKLF                                                                | ----- | ----- | ----- | ----- | : 372 |
| Drosophila_melanogaster_Rad21       | : | DTS--DILVTTLDLAPPT | ---- | ----- | ----- | KRLMYVKETGGVEKFLSPRSIPARALFG                                                    | ----- | ----- | ----- | ----- | : 398 |
| Caenorhabditis_elegans_Rad21        | : | DFS--DILRVVEMAPPT  | ---- | ----- | ----- | RKMFLNLCVSGDLQHLR                                                               | ----- | ----- | ----- | ----- | : 381 |
| Schizosaccharomyces_pombe_Rad21     | : | DTS--SHTSPLCLNTSS  | ---- | ----- | ----- | IVFNATVNF                                                                       | ----- | ----- | ----- | ----- | : 405 |
| Sordaria_macrospora_Rad21           | : | KRD--NLLKPKQTFGTQD | ---- | ----- | ----- | PYLMALLDL                                                                       | ----- | ----- | ----- | ----- | : 393 |
| Neurospora_crassa_Rad21             | : | KRD--NLLKPKQTFGTQD | ---- | ----- | ----- | PYLMALLDL                                                                       | ----- | ----- | ----- | ----- | : 393 |
| Aspergillus_niger_Rad21             | : | TRE--ELMKPSSWLRD   | ---- | ----- | ----- | PVLLTLMNM                                                                       | ----- | ----- | ----- | ----- | : 365 |
| Thalassiosira_pseudonana_Rad21      | : | DTS--DILMQRNFNIAD  | ---- | ----- | ----- | MPEEEEEEEDYTMVKINRLET                                                           | ----- | ----- | ----- | ----- | : 469 |
| Phaeodactylum_tricornutum_Rad21     | : | DTS--DILVQLQNVVHAT | ---- | ----- | ----- | WVPGQDKASHKRSARDLLFVH                                                           | ----- | ----- | ----- | ----- | : 406 |
| Fragilariopsis_cylindrus_Rad21      | : | NTD--GHVRT-MIHPAS  | ---- | ----- | ----- | IWDEEGLGRDYKTLVKERSAQDGIITINFIITSTGVNKKKSS                                      | ----- | ----- | ----- | ----- | : 425 |
| Pseudo-nitzschia_multiseriata_Rad21 | : | DTD--DILV-IPMIHPAS | ---- | ----- | ----- | IWDEEDTGGKDYRTLVRERRARDEGLNSNTNTNTRSNKRRKKTGVGFADGGAAISFS                       | ----- | ----- | ----- | ----- | : 243 |
| Pseudo-nitzschia_multiseriata_Rad21 | : | STD--DILV-IPMIHPAS | ---- | ----- | ----- | IWDEEGLGRDYRALVLDRIAEQASRKRKKGAVFRDVPGPAS                                       | ----- | ----- | ----- | ----- | : 458 |
| Seminavis_robusta_Rad21             | : | DTS--DILVQLQNVVHAT | ---- | ----- | ----- | DVWVNDVNNNDNNTLDASLSQASPGNLTGTQEQAAASHFSGLATLSAMTQCTEGMRPNSENGRILFEGEGEDDHLRLDT | ----- | ----- | ----- | ----- | : 567 |

|                                     | * | 920                                                         | *    | 940   | *     | 960                                                                         | *     | 980   | *     | 1000  |       |
|-------------------------------------|---|-------------------------------------------------------------|------|-------|-------|-----------------------------------------------------------------------------|-------|-------|-------|-------|-------|
| Arabidopsis_thaliana_Rec8_(SYN1)    | : | -----MPPTQLFEK                                              | ---- | ----- | ----- | -----DSSYPE                                                                 | ----- | ----- | ----- | ----- | : 347 |
| Oryza_sativa_Rec8                   | : | -----LPLVSLISSLEKSP                                         | ---- | ----- | ----- | -----LEFYYPK                                                                | ----- | ----- | ----- | ----- | : 395 |
| Oryza_sativa_Rad21-4/Rec8           | : | -----LPLVSLISSLEKSP                                         | ---- | ----- | ----- | -----LEFYYPK                                                                | ----- | ----- | ----- | ----- | : 351 |
| Homo_sapiens_Rec8                   | : | -----RGPALFRTPTLSG                                          | ---- | ----- | ----- | -----WLP                                                                    | ----- | ----- | ----- | ----- | : 360 |
| Mus_musculus_Rec8                   | : | -----TSPALFRTPTLSG                                          | ---- | ----- | ----- | -----WLP                                                                    | ----- | ----- | ----- | ----- | : 401 |
| Schizosaccharomyces_pombe_Rec8      | : | -----KELNKFWDWESFHP                                         | ---- | ----- | ----- | -----                                                                       | ----- | ----- | ----- | ----- | : 349 |
| Sordaria_macrospora_Rec8            | : | -----HPLAALFAGVDFAA                                         | ---- | ----- | ----- | -----EVLDDIDIDE                                                             | ----- | ----- | ----- | ----- | : 440 |
| Neurospora_crassa_Rec8              | : | -----HPLAALFSGANFAS                                         | ---- | ----- | ----- | -----EALGIDIDE                                                              | ----- | ----- | ----- | ----- | : 437 |
| Arabidopsis_thaliana_Rad21          | : | -----NPRSFLEPLIQYG                                          | ---- | ----- | ----- | -----SSDLQSLFCQ                                                             | ----- | ----- | ----- | ----- | : 533 |
| Oryza_sativa_Rad21                  | : | -----YRTYELVAHPTIHN                                         | ---- | ----- | ----- | -----MEIHVRLDMSQ                                                            | ----- | ----- | ----- | ----- | : 708 |
| Ricinus_communis_Rad21              | : | -----ADLCNLLKDYISGK                                         | ---- | ----- | ----- | -----PHLTLEREVTPEPRVTTSAFAPAI                                               | ----- | ----- | ----- | ----- | : 481 |
| Theobroma_cacao_Rad21               | : | -----QRMGQVDFDEPSTG                                         | ---- | ----- | ----- | -----SCADICIMF                                                              | ----- | ----- | ----- | ----- | : 412 |
| Zea_mays_Rad21                      | : | -----DMPEAITEDSNIAFGAATI                                    | ---- | ----- | ----- | -----DGLPLHPDGIQSDAMLPRANDAYGATAAFSLVPEPNNVNGASNDFVIGTLFQGVTPGPFIGNKEKEVALA | ----- | ----- | ----- | ----- | : 795 |
| Arabidopsis_thaliana_Rad21-3        | : | -----QNFNEPLFTG                                             | ---- | ----- | ----- | -----FSD                                                                    | ----- | ----- | ----- | ----- | : 418 |
| Arabidopsis_thaliana_Rad21-4        | : | -----IMIIENDDRHASVGAVEDNECSVTAVEENKTEESSDQAHFNDCDEQPGTAHTHE | ---- | ----- | ----- | -----                                                                       | ----- | ----- | ----- | ----- | : 690 |
| Oryza_sativa_Rad21-2                | : | -----SLPVTFMDPLIL                                           | ---- | ----- | ----- | -----YPT                                                                    | ----- | ----- | ----- | ----- | : 512 |
| Oryza_sativa_Rad21-3                | : | -----ATLRQTYERTFPHV                                         | ---- | ----- | ----- | -----TDF                                                                    | ----- | ----- | ----- | ----- | : 442 |
| Homo_sapiens_Rad21                  | : | -----LPAQPLWNNRLLKL                                         | ---- | ----- | ----- | -----FTRCLTE                                                                | ----- | ----- | ----- | ----- | : 395 |
| Mus_musculus_Rad21                  | : | -----LPAQPLWNNRLLKL                                         | ---- | ----- | ----- | -----FTRCLTE                                                                | ----- | ----- | ----- | ----- | : 395 |
| Danio_riero_Rad21                   | : | -----LPAQPLWNNRLLKL                                         | ---- | ----- | ----- | -----FTRCLTE                                                                | ----- | ----- | ----- | ----- | : 396 |
| Xenopus_(Silurana)_tropicalis_Rad21 | : | -----LPAQPLWNNRLLKL                                         | ---- | ----- | ----- | -----FTRCLTE                                                                | ----- | ----- | ----- | ----- | : 393 |
| Drosophila_melanogaster_Rad21       | : | -----NYNRQLFSHSTFFEDFSSVVPMEILALEFYTKENENALIFNKKGRKRNNDMSN  | ---- | ----- | ----- | -----                                                                       | ----- | ----- | ----- | ----- | : 453 |
| Caenorhabditis_elegans_Rad21        | : | -----EPGCKMFRN                                              | ---- | ----- | ----- | -----                                                                       | ----- | ----- | ----- | ----- | : 390 |
| Schizosaccharomyces_pombe_Rad21     | : | -----TRNGKNTSIFSSN                                          | ---- | ----- | ----- | -----                                                                       | ----- | ----- | ----- | ----- | : 422 |
| Sordaria_macrospora_Rad21           | : | -----QKTGAFVSNVLEN                                          | ---- | ----- | ----- | -----RSDSWADE                                                               | ----- | ----- | ----- | ----- | : 415 |
| Neurospora_crassa_Rad21             | : | -----QKNGAFVSSVLEN                                          | ---- | ----- | ----- | -----RSDSWADE                                                               | ----- | ----- | ----- | ----- | : 415 |
| Aspergillus_niger_Rad21             | : | -----QKNGDFVSNVLGAG                                         | ---- | ----- | ----- | -----RGRGWAF                                                                | ----- | ----- | ----- | ----- | : 386 |
| Thalassiosira_pseudonana_Rad21      | : | -----VPMERILARPCLG                                          | ---- | ----- | ----- | -----DGLIAP                                                                 | ----- | ----- | ----- | ----- | : 489 |
| Phaeodactylum_tricornutum_Rad21     | : | -----LSYEKILARPALGD                                         | ---- | ----- | ----- | -----DGQIAP                                                                 | ----- | ----- | ----- | ----- | : 426 |
| Fragilariopsis_cylindrus_Rad21      | : | -----KIVPSLTRPFLVD                                          | ---- | ----- | ----- | -----ESEMNGSESRLHP                                                          | ----- | ----- | ----- | ----- | : 452 |
| Pseudo-nitzschia_multiseriata_Rad21 | : | -----SSSSSKGAGSHAAPVSLTRPFLVD                               | ---- | ----- | ----- | -----AADRGGPALHP                                                            | ----- | ----- | ----- | ----- | : 279 |
| Pseudo-nitzschia_multiseriata_Rad21 | : | -----SGGVPSLTRPFLVD                                         | ---- | ----- | ----- | -----ASESGGPGIHP                                                            | ----- | ----- | ----- | ----- | : 483 |
| Seminavis_robusta_Rad21             | : | -----LPFEEILIRPSLGD                                         | ---- | ----- | ----- | -----DGQIAP                                                                 | ----- | ----- | ----- | ----- | : 587 |





```

*
Arabidopsis_thaliana_Rec8_(SYN1) : ---C-AEPVGDLLTARGPN-----M : 617
Oryza_sativa_Rec8 : LFPD-LDKVATPSLLSHRQ-----M : 679
Oryza_sativa_Rad21-4/Rec8 : ---C-LEPVGDLLISRGPK-----M : 608
Homo_sapiens_Rec8 : ---C-EKPVGRLLIQPGPK-----F : 546
Mus_musculus_Rec8 : ---C-QKPVGPIILIRPGPK-----F : 590
Schizosaccharomyces_pombe_Rec8 : ---C-DKPVSEIVSLSNLK-----S : 557
Sordaria_macrospora_Rec8 : QDMDFQPVGEIRVGVGVSEAEMLAMM : 757
Neurospora_crassa_Rec8 : QDMDFQPVGEIRVGVGVSEAEMLALM : 757
Arabidopsis_thaliana_Rad21 : ---C-NHPVSDVFLMRVSR-----P : 805
Oryza_sativa_Rad21 : ---R-PNSVDFVSVKPGPK-----L : 1050
Ricinus_communis_Rad21 : ---E-TDAVSSAILSSFVA-----T : 766
Theobroma_cacao_Rad21 : ---C-DDANGDITLKLTP-----L : 672
Zea_mays_Rad21 : ---C-PNPVLDLRIKPGSK-----L : 1171
Arabidopsis_thaliana_Rad21-3 : ---C-DRPVGDIALKLMPLA-----L : 687
Arabidopsis_thaliana_Rad21-4 : ---C-GKPVESIIKPRPK-----L : 1026
Oryza_sativa_Rad21-2 : ---C-EQTVGDIIVSATPR-----L : 739
Oryza_sativa_Rad21-3 : ---C-EAAVGV-----L : 713
Homo_sapiens_Rad21 : ---C-EEPVSDIATPGPK-----F : 628
Mus_musculus_Rad21 : ---C-EEPVSDIATPGPK-----F : 632
Danio_rerio_Rad21 : ---C-TEPVSDIAAPGPK-----F : 640
Xenopus_(Silurana)_tropicalis_Rad21 : ---C-AEPVSDIATPGPK-----F : 628
Drosophila_melanogaster_Rad21 : ---C-SAPVADITTRGPT-----F : 710
Caenorhabditis_elegans_Rad21 : ---C-SEPVGEIVIRPGAN-----F : 615
Schizosaccharomyces_pombe_Rad21 : ---C-DVAIQNEITLTAKR-----GML : 624
Sordaria_macrospora_Rad21 : ---C-KEGALGGHIRIRGKR--GLWGDW : 619
Neurospora_crassa_Rad21 : ---C-KEGALGGHIRIRGKR--GLWGDW : 619
Aspergillus_niger_Rad21 : ---C-RPETVGGFLKIRGKR--ALWGSW : 571
Thalassiosira_pseudonana_Rad21 : ---C-DKSVGDITITPGLR-----F : 736
Phaeodactylum_tricornutum_Rad21 : ---C-NESVGDTRISAGIK-----F : 656
Fragilariaopsis_cylindrus_Rad21 : ---C-EDSVGDITVSPGIR-----F : 712
Pseudo-nitzschia_multiseriata_Rad21 : ---C-EEAVGDITFSPGLR-----F : 531
Pseudo-nitzschia_multistriata_Rad21 : ---C-ERAVGDITVSPGLR-----F : 746
Seminavis_robusta_Rad21 : ---C-DEAVGDITVSPGLR-----F : 877

```
