# Supplementary material for: Identification of the meiotic toolkit in diatoms and exploration of meiosis-specific SPO11 and RAD51 homologs in the sexual species Pseudo-nitzschia multistriata and Seminavis robusta
Source: PubMed Central journal article supplement (PMC4647503; doi:10.1186/s12864-015-1983-5), 2015-11-14
Supplement: 12864_2015_1983_MOESM4_ESM.pdf [file 12864_2015_1983_MOESM4_ESM.pdf]

|                                        | * | 120                                                                      | *    | 140                                                          | *    | 160   | *     | 180   | *     | 200   |                        |
|----------------------------------------|---|--------------------------------------------------------------------------|------|--------------------------------------------------------------|------|-------|-------|-------|-------|-------|------------------------|
| Arabidopsis_thaliana_Dmcl1             | : | ---EKIVNFG---                                                            | ---- | YMTGSDALIKRKSUV---                                           | ---- | ----- | ----- | ----- | ----- | ----- | KITL : 73              |
| Oryza_sativa_Dmcl1                     | : | ---EKLLSQG---                                                            | ---- | FTTGSDDLKIKRKSUV---                                          | ---- | ----- | ----- | ----- | ----- | ----- | RITL : 73              |
| Mus_musculus_Dmcl1                     | : | ---NKLIIEPG---                                                           | ---- | FLTTFQYSERRKMVF---                                           | ---- | ----- | ----- | ----- | ----- | ----- | HITL : 73              |
| Homo_sapiens_Dmcl1                     | : | ---NKLIIEPG---                                                           | ---- | FLTTFEYSEKRRKMF---                                           | ---- | ----- | ----- | ----- | ----- | ----- | HITL : 73              |
| Danio_rerio_Dmcl1                      | : | ---GKLLTTCG---                                                           | ---- | FQTASEYCIKRRQVF---                                           | ---- | ----- | ----- | ----- | ----- | ----- | HITL : 73              |
| Ectocarpus_siliculosus_Dmcl1           | : | ---AKVDTSGS---                                                           | ---- | SGMFKTGLQCRQAREKVI---                                        | ---- | ----- | ----- | ----- | ----- | ----- | KVHL : 70              |
| Oryza_sativa_Rad51-A                   | : | ---SKLVPLG---                                                            | ---- | FTSASQHLAQRLEII---                                           | ---- | ----- | ----- | ----- | ----- | ----- | QVTL : 73              |
| Arabidopsis_thaliana_Rad51-A           | : | ---SKLVPLG---                                                            | ---- | FTSASQHLAQRQEI---                                            | ---- | ----- | ----- | ----- | ----- | ----- | QVTL : 73              |
| Mus_musculus_Rad51-A                   | : | ---AKLVPMG---                                                            | ---- | FTTATEFHQRSEII---                                            | ---- | ----- | ----- | ----- | ----- | ----- | QITL : 73              |
| Homo_sapiens_Rad51-A                   | : | ---AKLVPMG---                                                            | ---- | FTTATEFHQRSEII---                                            | ---- | ----- | ----- | ----- | ----- | ----- | QITL : 73              |
| Danio_rerio_Rad51-A                    | : | ---AKMVPMG---                                                            | ---- | FTTATEFHQRRAEII---                                           | ---- | ----- | ----- | ----- | ----- | ----- | QITL : 73              |
| Chlamydomonas_reinhardtii_Rad51-A      | : | ---FKMVPMG---                                                            | ---- | FTTAAVAEQRKEVI---                                            | ---- | ----- | ----- | ----- | ----- | ----- | SITL : 73              |
| Micromonas_sp._Rad51-A                 | : | ---TKVVPLG---                                                            | ---- | FTTASMVQAVRQDTI---                                           | ---- | ----- | ----- | ----- | ----- | ----- | MVTL : 73              |
| Ostreococcus_lucimarinus_Rad51-A       | : | ---NAIVPAG---                                                            | ---- | FTTAKMIDQQRQDTI---                                           | ---- | ----- | ----- | ----- | ----- | ----- | YITL : 73              |
| Ectocarpus_siliculosus_Rad51-A         | : | ---YKLVPLG---                                                            | ---- | FTTASQHLQQRDLI---                                            | ---- | ----- | ----- | ----- | ----- | ----- | TITL : 73              |
| Phaeodactylum_tricornutum_Rad51-A      | : | ---KSMVPMD---                                                            | ---- | FKTADALEDRKALV---                                            | ---- | ----- | ----- | ----- | ----- | ----- | TITL : 73              |
| Thalassiosira_pseudonana_Rad51-A       | : | ---KTMVPLD---                                                            | ---- | FKTADALEDRKALV---                                            | ---- | ----- | ----- | ----- | ----- | ----- | TITL : 73              |
| Fragilariopsis_cylindrus_Rad51-A2      | : | ---KGLVPMG---                                                            | ---- | FKTADALLDRKAIV---                                            | ---- | ----- | ----- | ----- | ----- | ----- | NITL : 73              |
| Fragilariopsis_cylindrus_Rad51-A1      | : | ---NTMVTME---                                                            | ---- | FQTADALEDRQGLV---                                            | ---- | ----- | ----- | ----- | ----- | ----- | TITL : 73              |
| Pseudo-nitzschia_multiseriata_Rad51-A2 | : | ---KQMVSMG---                                                            | ---- | FKTADALEDRQSI A---                                           | ---- | ----- | ----- | ----- | ----- | ----- | HITL : 73              |
| Pseudo-nitzschia_multiseriata_Rad51-A1 | : | ---KQMVSMG---                                                            | ---- | FQTADALETRKNIV---                                            | ---- | ----- | ----- | ----- | ----- | ----- | MITL : 73              |
| Pseudo-nitzschia_multistriata_Rad51-A2 | : | ---KQMVSMG---                                                            | ---- | FKTADALEDRQTI A---                                           | ---- | ----- | ----- | ----- | ----- | ----- | MITL : 73              |
| Pseudo-nitzschia_multistriata_Rad51-A1 | : | ---KQMVSMG---                                                            | ---- | FQTADTXLEARNIV---                                            | ---- | ----- | ----- | ----- | ----- | ----- | QITL : 73              |
| Seminavis_robusta_Rad51-A              | : | ---MVPMD---                                                              | ---- | FKTADALEDRKSIV---                                            | ---- | ----- | ----- | ----- | ----- | ----- | TITL : 24              |
| Arabidopsis_thaliana_Rad51-B           | : | ---SEATSPP---                                                            | ---- | CSQRSLEKKVENEHLSG---                                         | ---- | ----- | ----- | ----- | ----- | ----- | HITL : 77              |
| Oryza_sativa_Rad51-B                   | : | ---SEIACPP---                                                            | ---- | YQTLALLEAFRARGDG---                                          | ---- | ----- | ----- | ----- | ----- | ----- | RLAL : 75              |
| Mus_musculus_Rad51-B                   | : | ---SKACAPQ---                                                            | ---- | MQTAYELKTRRS AHLSPA---                                       | ---- | ----- | ----- | ----- | ----- | ----- | FLSL : 76              |
| Homo_sapiens_Rad51-B                   | : | ---SRACAPK---                                                            | ---- | MQTAYELKTRRS AHLSPA---                                       | ---- | ----- | ----- | ----- | ----- | ----- | FLSL : 76              |
| Danio_rerio_Rad51-B                    | : | ---SKACAPA---                                                            | ---- | VITADLDLWKRKEEL---                                           | ---- | ----- | ----- | ----- | ----- | ----- | CFSL : 72              |
| Chlamydomonas_reinhardtii_Rad51-B      | : | ---SAQISPP---                                                            | ---- | YSTYDYVFTQQTAEAPA---                                         | ---- | ----- | ----- | ----- | ----- | ----- | PIHL : 76              |
| Micromonas_pusilla_Rad51-B             | : | ---AKCVCPK---                                                            | ---- | PQTAMALLRQGGGGGGGTARSSSGARASAS---                            | ---- | ----- | ----- | ----- | ----- | ----- | GDGGGGGGASWPAFLP : 103 |
| Ostreococcus_lucimarinus_Rad51-B       | : | ---AKAVAPT---                                                            | ---- | PTTALDLARRSQ---                                              | ---- | ----- | ----- | ----- | ----- | ----- | YVPL : 70              |
| Ectocarpus_siliculosus_Rad51-B         | : | ---STRIVPEQ---                                                           | ---- | AKTADGLLRERREAGASF---                                        | ---- | ----- | ----- | ----- | ----- | ----- | FVAT : 77              |
| Thalassiosira_pseudonana_Rad51-B       | : | -----                                                                    | ---- | DDDDVDVETASDD---                                             | ---- | ----- | ----- | ----- | ----- | ----- | DITL : 48              |
| Phaeodactylum_tricornutum_Rad51-B      | : | GSVTHRIRTVGPLLQCSAASLVRTL DPL---                                         | ---- | LYTPELLHSTTSSLNDCNCRCEETF SRMR---                            | ---- | ----- | ----- | ----- | ----- | ----- | YVPL : 123             |
| Fragilariopsis_cylindrus_Rad51-B       | : | ---CNQCSPK---                                                            | ---- | PNSVLQLKDDTTNANADGICSEQNNESEQDQQQQRPSTASSTTTDPITFGSSMRDLP--- | ---- | ----- | ----- | ----- | ----- | ----- | HLIT : 152             |
| Pseudo-nitzschia_multiseriata_Rad51-B  | : | ---CKQCAPE---                                                            | ---- | SRSVLKLYRATTANTNANANANTDLN-AIPRD---                          | ---- | ----- | ----- | ----- | ----- | ----- | ADPVAFGSRMRHL : 134    |
| Pseudo-nitzschia_multistriata_Rad51-B  | : | ---CNQCAPN---                                                            | ---- | PISLELLEFGATTLNTDNVLGMSXYRDEGKQHE---                         | ---- | ----- | ----- | ----- | ----- | ----- | NDPISFGSKMRYL : 134    |
| Seminavis_robusta_Rad51-B              | : | ---AKVCCPP---                                                            | ---- | PQTLLELLQSQSQHANAK---                                        | ---- | ----- | ----- | ----- | ----- | ----- | YFPL : 95              |
| Arabidopsis_thaliana_Rad51-C           | : | ---NQSCCNGSRSLING---                                                     | ---- | AKNWDMLHEEESLP---                                            | ---- | ----- | ----- | ----- | ----- | ----- | RITL : 80              |
| Oryza_sativa_Rad51-C                   | : | DGPSTSSVLKG---                                                           | ---- | VQNEWDMLSDEQSR---                                            | ---- | ----- | ----- | ----- | ----- | ----- | HITL : 86              |
| Mus_musculus_Rad51-C                   | : | ---RRECLTNKPRCAGTSVANE---                                                | ---- | KCTALELLEQEHTQG---                                           | ---- | ----- | ----- | ----- | ----- | ----- | FITL : 85              |
| Homo_sapiens_Rad51-C                   | : | ---RRECLTNKPRYAGTSESHK---                                                | ---- | KCTALELLEQEHTQG---                                           | ---- | ----- | ----- | ----- | ----- | ----- | FITL : 85              |
| Danio_rerio_Rad51-C                    | : | ---RDDAQPPQQRAAAD---                                                     | ---- | GVTELDLHLHQEQTLG---                                          | ---- | ----- | ----- | ----- | ----- | ----- | SVTL : 80              |
| Chlamydomonas_reinhardtii_Rad51-C      | : | GGPASSNWRAG---                                                           | ---- | TVSRADLLVAAAATP---                                           | ---- | ----- | ----- | ----- | ----- | ----- | RITL : 81              |
| Micromonas_pusilla_Rad51-C             | : | RFVGDGTALAG---                                                           | ---- | ARSAEELLREETGKL---                                           | ---- | ----- | ----- | ----- | ----- | ----- | PIYL : 78              |
| Ostreococcus_lucimarinus_Rad51-C       | : | RFNPEGIALRG---                                                           | ---- | ARSAEELLREERARW---                                           | ---- | ----- | ----- | ----- | ----- | ----- | SVTL : 80              |
| Ectocarpus_siliculosus_Rad51-C         | : | -----                                                                    | ---- | GASARELLIVGRHKK---                                           | ---- | ----- | ----- | ----- | ----- | ----- | PIYL : 41              |
| Phaeodactylum_tricornutum_Rad51-C      | : | ---DSLRLTTPV---                                                          | ---- | TKTAALEENVEGGG---                                            | ---- | ----- | ----- | ----- | ----- | ----- | CITL : 80              |
| Thalassiosira_pseudonana_Rad51-C       | : | TVNETPITPSSSSHH---                                                       | ---- | ACQASILLRSTHSSSSSTQQRH---                                    | ---- | ----- | ----- | ----- | ----- | ----- | NIVS : 105             |
| Fragilariopsis_cylindrus_Rad51-C       | : | -----                                                                    | ---- | -----                                                        | ---- | ----- | ----- | ----- | ----- | ----- | HVVS : 27              |
| Pseudo-nitzschia_multiseriata_Rad51-C  | : | NNNNHNRYGGDSENANGANNATASSGGTNDNDDGIVTAYDLHHLHQLTNTDAIGGVDRRRRK---        | ---- | -----                                                        | ---- | ----- | ----- | ----- | ----- | ----- | HITL : 132             |
| Pseudo-nitzschia_multistriata_Rad51-C  | : | RGRADASNENQSIGIGKDNEHNGTEAPPKSRDHDDGIVTAYELHLRS DPLSFPGSNTGRSQSRSRSGC--- | ---- | -----                                                        | ---- | ----- | ----- | ----- | ----- | ----- | LPNG : 136             |
| Seminavis_robusta_Rad51-C              | : | ---SGAAQPMGQ---                                                          | ---- | AKTASQLLNVNPNNAKMGSR---                                      | ---- | ----- | ----- | ----- | ----- | ----- | KVTL : 84              |
| Arabidopsis_thaliana_Xrcc3             | : | -----                                                                    | ---- | KIKPENLLRSP TNR---                                           | ---- | ----- | ----- | ----- | ----- | ----- | KITL : 23              |
| Oryza_sativa_Xrcc3                     | : | -----                                                                    | ---- | PENPLLLPSSRAG---                                             | ---- | ----- | ----- | ----- | ----- | ----- | KISL : 45              |
| Mus_musculus_Xrcc3                     | : | ---SLHLRGSR---                                                           | ---- | VLSALHLEFQKESFPPEQH---                                       | ---- | ----- | ----- | ----- | ----- | ----- | RISL : 78              |
| Homo_sapiens_Xrcc3                     | : | ---SLHLRGSR---                                                           | ---- | ILTEQLLHQKERFPPTQH---                                        | ---- | ----- | ----- | ----- | ----- | ----- | RISL : 78              |
| Danio_rerio_Xrcc3                      | : | ---AASVRKSK---                                                           | ---- | PVTELLQIQECEPVLPEGH---                                       | ---- | ----- | ----- | ----- | ----- | ----- | RISF : 78              |
| Micromonas_sp._Xrcc3                   | : | -----                                                                    | ---- | PKVTRERISADPSTWAP---                                         | ---- | ----- | ----- | ----- | ----- | ----- | KITL : 30              |
| Ostreococcus_lucimarinus_Xrcc3         | : | -----                                                                    | ---- | MRVAAAAADARAA---                                             | ---- | ----- | ----- | ----- | ----- | ----- | CVSL : 18              |
| Ectocarpus_siliculosus_Xrcc3           | : | -----                                                                    | ---- | TTLAMSKDAARLD---                                             | ---- | ----- | ----- | ----- | ----- | ----- | RISF : 65              |
| Thalassiosira_pseudonana_Xrcc3         | : | RYGNASRRRI IQHGNSRNGDRGEGGRNSNLSLVQVSYSAMELYRKHESWRSSWRKHYNQLQKEKT---    | ---- | -----                                                        | ---- | ----- | ----- | ----- | ----- | ----- | TKENA : 140            |
| Phaeodactylum_tricornutum_Xrcc3        | : | ISVQSPLLPS---                                                            | ---- | PTTALQLLQRHQQRHTLRL---                                       | ---- | ----- | ----- | ----- | ----- | ----- | LIPN : 87              |
| Fragilariopsis_cylindrus_Xrcc3         | : | -----                                                                    | ---- | PSSSSSSSSSSHSS---                                            | ---- | ----- | ----- | ----- | ----- | ----- | ENDA : 28              |
| Pseudo-nitzschia_multiseriata_Xrcc3    | : | -----                                                                    | ---- | -----                                                        | ---- | ----- | ----- | ----- | ----- | ----- | - : -                  |
| Pseudo-nitzschia_multistriata_Xrcc3    | : | NGSSSXNRIGG---                                                           | ---- | FETTYNEYSGNSRSTRSLSSSV---                                    | ---- | ----- | ----- | ----- | ----- | ----- | SAPP : 86              |
| Seminavis_robusta_Xrcc3                | : | RWTNKRKSKIQ---                                                           | ---- | PMTEFSLQKNQ SARQ---                                          | ---- | ----- | ----- | ----- | ----- | ----- | SVYL : 94              |
| Sulfolobus_solfataricus_Rad-A          | : | ---RDALDIR---                                                            | ---- | FKTALVKKERMNVK---                                            | ---- | ----- | ----- | ----- | ----- | ----- | KISL : 73              |
| Aeropyrum_pernix_Rad-A                 | : | ---REALNID---                                                            | ---- | FRPQYDLKIESMNIK---                                           | ---- | ----- | ----- | ----- | ----- | ----- | KITL : 73              |

|                                        | * | 220                        | *    | 240   | *                         | 260   | *   | 280   | *    | 300 |       |
|----------------------------------------|---|----------------------------|------|-------|---------------------------|-------|-----|-------|------|-----|-------|
| Arabidopsis_thaliana_Dmcl              | : | GCQA-----LDDLLGGG-----     | ETS  | ----- | ALTEAFGEFRRSGKTOAHTLQVTTQ | ----- | LPT | ----- | NMKG | -N  | : 123 |
| Oryza_sativa_Dmcl                      | : | GSQA-----LDELGGG-----      | ETL  | ----- | CIIEAFGEFRRSGKTOAHTLQVSAQ | ----- | LPI | ----- | HMHG | -N  | : 123 |
| Mus_musculus_Dmcl                      | : | GSQE-----FDKLLGGG-----     | ESM  | ----- | ALTEAFGEFRRSGKTOAHTLQVTAQ | ----- | LPG | ----- | TGYS | -G  | : 123 |
| Homo_sapiens_Dmcl                      | : | GSQE-----FDKLLGGG-----     | ESM  | ----- | ALTEAFGEFRRSGKTOAHTLQVTAQ | ----- | LPG | ----- | AGYP | -G  | : 123 |
| Danio_erio_Dmcl                        | : | GSLE-----FDKLLGGG-----     | VESM | ----- | ALTEAFGEFRRSGKTOAHTLQVTAQ | ----- | LPG | ----- | EYGT | -G  | : 123 |
| Ectocarpus_siliculosus_Dmcl            | : | GSKQ-----LDLALGGG-----     | ETG  | ----- | SITTEFGFRRSGKTOAHTLQVTSQ  | ----- | LSK | ----- | ESGG | --- | : 119 |
| Oryza_sativa_Rad51-A                   | : | GSRE-----LDKLLDGG-----     | ETG  | ----- | SITTEYGEFRRSGKTOAHTLQVTCQ | ----- | LPL | ----- | DOGG | -E  | : 123 |
| Arabidopsis_thaliana_Rad51-A           | : | GSRE-----LDKLLDGG-----     | ETG  | ----- | SITTEYGEFRRSGKTOAHTLQVTCQ | ----- | LPM | ----- | DOGG | -E  | : 123 |
| Mus_musculus_Rad51-A                   | : | GSKE-----LDKLLDGG-----     | ETG  | ----- | SITTEYGEFRRSGKTOAHTLQVTCQ | ----- | LPI | ----- | DRGG | -E  | : 123 |
| Homo_sapiens_Rad51-A                   | : | GSKE-----LDKLLDGG-----     | ETG  | ----- | SITTEYGEFRRSGKTOAHTLQVTCQ | ----- | LPI | ----- | DRGG | -E  | : 123 |
| Danio_erio_Rad51-A                     | : | GSKE-----LDKLLDGG-----     | ETG  | ----- | SITTEYGEFRRSGKTOAHTLQVTCQ | ----- | LPI | ----- | DOGG | -E  | : 123 |
| Chlamydomonas_reinhardtii_Rad51-A      | : | GCKE-----LDLTLGGG-----     | ETG  | ----- | SITTEYGEYRCCKTOAHTLQVTCQ  | ----- | LPV | ----- | EMGG | -E  | : 123 |
| Micromonas_sp._Rad51-A                 | : | GASK-----LDLTLGGG-----     | FESG | ----- | SITTEYGEFRRSGKTOAHTLQVTCQ | ----- | LFL | ----- | DOGG | -E  | : 123 |
| Ostreococcus_lucimarinus_Rad51-A       | : | GSAK-----VDELQGGG-----     | ESG  | ----- | SVTEYGEFRRSGKTOAHTLQVTSQ  | ----- | MPI | ----- | EHGG | -E  | : 123 |
| Ectocarpus_siliculosus_Rad51-A         | : | GSKE-----LDKLLDGG-----     | ETG  | ----- | SITTEYGEFRRSGKTOAHTLQVTCQ | ----- | MPL | ----- | DAGG | -E  | : 123 |
| Phaeodactylum_tricornutum_Rad51-A      | : | GSIE-----LDKLLDGG-----     | ETG  | ----- | SITTEYGEFRRSGKTOAHTLQVTCQ | ----- | MAV | ----- | TEGG | -E  | : 123 |
| Thalassiosira_pseudonana_Rad51-A       | : | GSTE-----LDKLLDGG-----     | ETG  | ----- | SITTEYGEFRRSGKTOAHTLQVTCQ | ----- | MEI | ----- | SEGG | -E  | : 123 |
| Fragilariopsis_cylindrus_Rad51-A2      | : | GSVE-----VDKLLDGG-----     | ETG  | ----- | SITTEYGEFRRSGKTOAHTLQVTCQ | ----- | MSI | ----- | DOGG | -E  | : 123 |
| Fragilariopsis_cylindrus_Rad51-A1      | : | GAVE-----LDKLLDGG-----     | ETG  | ----- | SITTEYGEFRRSGKTOAHTLQVTCQ | ----- | MAT | ----- | DNGG | -E  | : 123 |
| Pseudo-nitzschia_multiseriata_Rad51-A2 | : | GSVE-----IDKLLDGG-----     | ETG  | ----- | SITTEYGEFRRSGKTOAHTLQVTCQ | ----- | MPI | ----- | SEGG | -E  | : 123 |
| Pseudo-nitzschia_multiseriata_Rad51-A1 | : | GSVE-----IDKLLDGG-----     | ETG  | ----- | SITTEYGEFRRSGKTOAHTLQVTCQ | ----- | MSC | ----- | GEGG | -E  | : 123 |
| Pseudo-nitzschia_multiseriata_Rad51-A2 | : | GAVE-----LDKLLDGG-----     | ETG  | ----- | SITTEYGEFRRSGKTOAHTLQVTCQ | ----- | MEV | ----- | SDGG | -E  | : 123 |
| Pseudo-nitzschia_multiseriata_Rad51-A1 | : | GSXE-----IDKLLDGG-----     | ETG  | ----- | SITTEYGEFRRSGKTOAHTLQVTCQ | ----- | MSC | ----- | GEGG | -E  | : 123 |
| Seminavis_robusta_Rad51-A              | : | GSVE-----LDKLLDGG-----     | ETG  | ----- | SITTEYGEFRRSGKTOAHTLQVTCQ | ----- | MGV | ----- | NEGG | -E  | : 74  |
| Arabidopsis_thaliana_Rad51-B           | : | HLKG-----LDLTLGGG-----     | FPFG | ----- | VLTEYVGGPGGKSOAHTLQVAVAS  | ----- | FFV | ----- | AYGL | -D  | : 127 |
| Oryza_sativa_Rad51-B                   | : | TLRG-----LDEALHGG-----     | FPAG | ----- | KLTEYVGGPSGKTOAHTLQVAVAT  | ----- | LPE | ----- | CYGL | -N  | : 125 |
| Mus_musculus_Rad51-B                   | : | TLCA-----LDEALHGG-----     | FPCC | ----- | SLTEYVGGPGGKTOAHTLQVAVLAT | ----- | LPT | ----- | SLGL | -E  | : 126 |
| Homo_sapiens_Rad51-B                   | : | TLCA-----LDEALHGG-----     | VACG | ----- | SLTEYVGGPGGKTOAHTLQVAVLAT | ----- | LPT | ----- | NMGL | -E  | : 126 |
| Danio_erio_Rad51-B                     | : | SLPA-----LDLTLHGG-----     | FPFG | ----- | ALTEYVGGPSGKTOAHTLQVAVLAT | ----- | LPK | ----- | SLGL | -D  | : 122 |
| Chlamydomonas_reinhardtii_Rad51-B      | : | GLPT-----LDGALHGG-----     | FPFG | ----- | VLTEYVGGPGGKSOAHTLQVAVAV  | ----- | MPE | ----- | ALGL | -G  | : 126 |
| Micromonas_pusilla_Rad51-B             | : | HAAA-----LDLALHGG-----     | FPFG | ----- | SITTEYVGGPAGKTOAHTLQVAVAA | ----- | APK | ----- | SVGL | -D  | : 153 |
| Ostreococcus_lucimarinus_Rad51-B       | : | VIED-----VDEALHGG-----     | FRVG | ----- | AVTEYVGAAGKTOAHTLQVAVAA   | ----- | APA | ----- | RVGR | -D  | : 120 |
| Ectocarpus_siliculosus_Rad51-B         | : | GIQP-----LDLALHGG-----     | FPFG | ----- | VLTEYVGGPAGKTOAHTLQVAVAA  | ----- | LPA | ----- | KLGL | -D  | : 129 |
| Thalassiosira_pseudonana_Rad51-B       | : | GLPT-----LDSSALGG-----     | FPFG | ----- | SITTEYVGGPAGKTOAHTLQVAVAA | ----- | --- | ----- | KSGP | --- | : 93  |
| Phaeodactylum_tricornutum_Rad51-B      | : | GLEP-----LDQALHGG-----     | FRVG | ----- | VLTEYVGGPAGKTOAHTLQVAVAA  | ----- | RYA | ----- | ---  | --- | : 167 |
| Fragilariopsis_cylindrus_Rad51-B       | : | CLPS-----LDLTLHGG-----     | FRVG | ----- | VLTEYVGGSGKTOAHTLQVAVAA   | ----- | KFN | ----- | ---  | --- | : 196 |
| Pseudo-nitzschia_multiseriata_Rad51-B  | : | SLPS-----LDLTLHGG-----     | FRLT | ----- | TVTEYVGRSGVGTTOAHTLQVAVAA | ----- | KFN | ----- | ---  | --- | : 178 |
| Pseudo-nitzschia_multiseriata_Rad51-B  | : | SLPS-----LDLTLHGG-----     | FRLA | ----- | TVTEYVGRSGVGTTOAHTLQVAVAA | ----- | KFN | ----- | ---  | --- | : 178 |
| Seminavis_robusta_Rad51-B              | : | GWTA-----LDNCHHGG-----     | FRFG | ----- | SLTEYVGGPAGKTOAHTLQVAVAA  | ----- | ARC | ----- | ---  | --- | : 140 |
| Arabidopsis_thaliana_Rad51-C           | : | SCSD-----LDNCHHGG-----     | FRSR | ----- | DLTEYVGGVPGKTOAHTLQVAVAV  | ----- | FRP | ----- | ECGL | -G  | : 130 |
| Oryza_sativa_Rad51-C                   | : | GSAD-----LDNCHHGG-----     | FRCK | ----- | DLTEYVGGVPGKTOAHTLQVAVAV  | ----- | FRV | ----- | EYGL | -G  | : 136 |
| Mus_musculus_Rad51-C                   | : | FCSA-----LDNCHHGG-----     | FRPL | ----- | KTTEYVGGVPGKTOAHTLQVAVAV  | ----- | IPE | ----- | CFGV | -A  | : 135 |
| Homo_sapiens_Rad51-C                   | : | FCSA-----LDNCHHGG-----     | FRPL | ----- | KTTEYVGGVPGKTOAHTLQVAVAV  | ----- | IPE | ----- | CFGV | -A  | : 135 |
| Danio_erio_Rad51-C                     | : | FCSG-----LDLALHGG-----     | FRVG | ----- | KTTEYVGGVPGKTOAHTLQVAVAV  | ----- | FRV | ----- | FFGL | -G  | : 130 |
| Chlamydomonas_reinhardtii_Rad51-C      | : | MARD-----LDLALHGG-----     | VAAQ | ----- | QVTEYVGGVPGKTOAHTLQVAVAV  | ----- | FRP | ----- | SLGP | -E  | : 131 |
| Micromonas_pusilla_Rad51-C             | : | FSSE-----LDLALHGG-----     | VAAQ | ----- | DLTEYVGGVPGKTOAHTLQVAVAV  | ----- | FRP | ----- | AFGY | -D  | : 128 |
| Ostreococcus_lucimarinus_Rad51-C       | : | FCEA-----LDLALHGG-----     | AASG | ----- | DLTEYVGGVPGKTOAHTLQVAVAV  | ----- | FRP | ----- | AFGL | -G  | : 130 |
| Ectocarpus_siliculosus_Rad51-C         | : | FCRE-----IDGMMGGG-----     | FRPG | ----- | DLTEYVGGVPGKTOAHTLQVAVAV  | ----- | FRP | ----- | QFGV | -G  | : 91  |
| Phaeodactylum_tricornutum_Rad51-C      | : | FCRH-----VDLTLHGG-----     | FRMG | ----- | DLTEYVGGVPGKTOAHTLQVAVAV  | ----- | FRP | ----- | TFGV | -A  | : 130 |
| Thalassiosira_pseudonana_Rad51-C       | : | FSHP-----LDLALHGG-----     | FRPL | ----- | DLTEYVGGVPGKTOAHTLQVAVAV  | ----- | FRP | ----- | KNGV | -E  | : 155 |
| Fragilariopsis_cylindrus_Rad51-C       | : | FCKS-----LDKLLDGG-----     | FRSL | ----- | QVTEYVGGVPGKTOAHTLQVAVAV  | ----- | FRP | ----- | EFGV | -E  | : 77  |
| Pseudo-nitzschia_multiseriata_Rad51-C  | : | FCRS-----IDDLHGGG-----     | FRSL | ----- | QVTEYVGGVPGKTOAHTLQVAVAV  | ----- | FRP | ----- | AFGV | -G  | : 182 |
| Pseudo-nitzschia_multiseriata_Rad51-C  | : | FCRS-----VDLTLHGG-----     | FRSL | ----- | DLTEYVGGVPGKTOAHTLQVAVAV  | ----- | FRP | ----- | SFGV | -G  | : 186 |
| Seminavis_robusta_Rad51-C              | : | FCRS-----VDSMHGGG-----     | FRSL | ----- | DLTEYVGGVPGKTOAHTLQVAVAV  | ----- | FRP | ----- | YGGV | -E  | : 134 |
| Arabidopsis_thaliana_Xrcc3             | : | GCEI-----LPGCHHGG-----     | FRSD | ----- | DLTEYVGGVPGKTOAHTLQVAVAV  | ----- | FRP | ----- | SHGL | -N  | : 73  |
| Oryza_sativa_Xrcc3                     | : | GCPV-----LDLTLHGG-----     | FRPA | ----- | SVTEYVGGVPGKTOAHTLQVAVAV  | ----- | FRP | ----- | ---  | --- | : 91  |
| Mus_musculus_Xrcc3                     | : | GCPV-----LDLTLHGG-----     | FRPL | ----- | GIIEYVGGVPGKTOAHTLQVAVAV  | ----- | FRP | ----- | YGGV | -E  | : 128 |
| Homo_sapiens_Xrcc3                     | : | GCPV-----LDLTLHGG-----     | FRPL | ----- | GIIEYVGGVPGKTOAHTLQVAVAV  | ----- | FRP | ----- | QHGL | -E  | : 128 |
| Danio_erio_Xrcc3                       | : | ACPV-----LDLTLHGG-----     | FRPL | ----- | GIIEYVGGVPGKTOAHTLQVAVAV  | ----- | FRP | ----- | EHGL | -N  | : 128 |
| Micromonas_sp._Xrcc3                   | : | ACPV-----IDKMLHGG-----     | FRPR | ----- | HVTEYVGGVPGKTOAHTLQVAVAV  | ----- | FRP | ----- | EVGL | -D  | : 80  |
| Ostreococcus_lucimarinus_Xrcc3         | : | MCPR-----IDLALHGG-----     | FRPR | ----- | HVTEYVGGVPGKTOAHTLQVAVAV  | ----- | FRP | ----- | ARG  | --- | : 62  |
| Ectocarpus_siliculosus_Xrcc3           | : | GCPS-----LDLALHGG-----     | FRVQ | ----- | GVTEYVGGVPGKTOAHTLQVAVAV  | ----- | FRP | ----- | EAGL | --- | : 114 |
| Thalassiosira_pseudonana_Xrcc3         | : | GGGMKLMRPLFLFSRCSGGSGSNEQS | FRVQ | ----- | GVTEYVGGVPGKTOAHTLQVAVAV  | ----- | FRP | ----- | MTPL | --- | : 230 |
| Phaeodactylum_tricornutum_Xrcc3        | : | G-----ESMS-----            | FRAR | ----- | GVTEYVGGVPGKTOAHTLQVAVAV  | ----- | FRP | ----- | ---  | --- | : 148 |
| Fragilariopsis_cylindrus_Xrcc3         | : | AVKP-----                  | FRAL | ----- | ALTEYVGGVPGKTOAHTLQVAVAV  | ----- | FRP | ----- | ---  | --- | : 61  |
| Pseudo-nitzschia_multiseriata_Xrcc3    | : | ---                        | FRAL | ----- | ALTEYVGGVPGKTOAHTLQVAVAV  | ----- | FRP | ----- | QHES | --- | : 40  |
| Pseudo-nitzschia_multiseriata_Xrcc3    | : | ---                        | FRAL | ----- | ALTEYVGGVPGKTOAHTLQVAVAV  | ----- | FRP | ----- | QYS  | --- | : 135 |
| Seminavis_robusta_Xrcc3                | : | ---                        | FRAL | ----- | ALTEYVGGVPGKTOAHTLQVAVAV  | ----- | FRP | ----- | GRSH | --- | : 159 |
| Sulfolobus_solfataricus_Rad-A          | : | ---                        | FRAL | ----- | ALTEYVGGVPGKTOAHTLQVAVAV  | ----- | FRP | ----- | ERGL | -S  | : 123 |
| Aeropyrum_pernix_Rad-A                 | : | ---                        | FRAL | ----- | ALTEYVGGVPGKTOAHTLQVAVAV  | ----- | FRP | ----- | DKGL | -E  | : 123 |

gg

g K3q

```

*          *          *          *          *          *          *          *
320          340          360          380          400
Arabidopsis_thaliana_Dmcl : --GKVAIIDTE--GTFR--PDRIVP--IAERF-----GMDP-- : 151
Oryza_sativa_Dmcl : --GKVAIIDTE--GTFR--PDRIVP--IAERF-----GMDA-- : 151
Mus_musculus_Dmcl : --GKIIFIDTE--NTRF--PDRIRD--IADRF-----NVDH-- : 151
Homo_sapiens_Dmcl : --GKIIFIDTE--NTRF--PDRIRD--IADRF-----NVDH-- : 151
Danio_riero_Dmcl : --GKVHVIDTE--NTRF--PERUKD--IADRF-----NVDH-- : 151
Ectocarpus_siliculosus_Dmcl : -----GGRVR--PRRGVQ--CLHARVSFL----- : 139
Oryza_sativa_Rad51-A : --GKAIYIDAE--GTFR--PORILQ--IADRF-----GLNG-- : 151
Arabidopsis_thaliana_Rad51-A : --GKAMYIGAE--GTFR--PORILQ--IADRF-----GLNG-- : 151
Mus_musculus_Rad51-A : --GKAMYIDTE--GTFR--PERULA--VAERY-----GLSG-- : 151
Homo_sapiens_Rad51-A : --GKAMYIDTE--GTFR--PERULA--VAERY-----GLSG-- : 151
Danio_riero_Rad51-A : --GKAMYIDTE--GTFR--PERULA--VAERY-----GLVG-- : 151
Chlamydomonas_reinhardtii_Rad51-A : --GKAMYIDTE--GTFR--PORISQ--IAERY-----GLAP-- : 151
Micromonas_sp._Rad51-A : --GKAMYIDTE--GTFR--PORILQ--IAERF-----GMDP-- : 151
Ostreococcus_lucimarinus_Rad51-A : --GKCLYIDTE--GTFR--PORILQ--IAERF-----NMDP-- : 151
Ectocarpus_siliculosus_Rad51-A : --GKAMYIDTE--GTFR--PORITA--IAERF-----GLNG-- : 151
Phaeodactylum_tricornutum_Rad51-A : --GKAIYIDTE--GTFR--PNRLOA--IAERF-----GLDP-- : 151
Thalassiosira_pseudonana_Rad51-A2 : --GKAIYIDTE--GTFR--PNRLOA--IAERF-----GMDP-- : 151
Fragilariopsis_cylindrus_Rad51-A2 : --GKAMYIDTE--GSFR--PERUKL--IAERF-----GLDP-- : 151
Fragilariopsis_cylindrus_Rad51-A1 : --GKAMYIDTE--GSFR--PERUKA--IAERF-----GLDP-- : 151
Pseudo-nitzschia_multiseries_Rad51-A2 : --GKAIYIDTE--GSFR--PERURA--IAERF-----GLDP-- : 151
Pseudo-nitzschia_multiseries_Rad51-A1 : --GKAIYIDTE--GSFR--PERUKA--IAERF-----GLDP-- : 151
Pseudo-nitzschia_multistriata_Rad51-A2 : --GKAIYIDTE--GSFR--PERURA--IAERF-----GLDP-- : 151
Pseudo-nitzschia_multistriata_Rad51-A1 : --GKAIYIDTE--GSFR--PERUKV--IAERF-----GLDP-- : 151
Seminavis_robusta_Rad51-A : --GKAIYIDTE--GSFR--PARLOA--IAERF-----GLDP-- : 102
Arabidopsis_thaliana_Rad51-B : --GRVYIDVE--SKFS--SRRVIE--VLESFPEV-----FHLKG-- : 162
Oryza_sativa_Rad51-B : --GRVYIDVE--SKFS--SRRMIE--GKSFPPQI-----FRQEG-- : 160
Mus_musculus_Rad51-B : --GAVYIDTE--SAFT--ABRIVE--AESRFPQY-----FNTE-- : 158
Homo_sapiens_Rad51-B : --GAVYIDTE--SAFS--ABRIVE--AESRFPQY-----FNTE-- : 158
Danio_riero_Rad51-B : --SGVYIDTE--SAFS--ABRIVE--AQSRFPPEF-----PSVK-- : 154
Chlamydomonas_reinhardtii_Rad51-B : --AGVYIDTE--RKFS--APRLOE--VHARVAEA--AAAAGPQAAHVLPQ-- : 172
Micromonas_pusilla_Rad51-B : --GGVYIDTE--QKFS--GVRJAE--LRAKFPQV-----YDGGDGPSEADA-- : 200
Ostreococcus_lucimarinus_Rad51-B : --GGVYIDAE--RKFS--GARJAE--LAREKPGA-----FEDEE-- : 155
Ectocarpus_siliculosus_Rad51-B : --AGVYIDTE--RKFS--PDRIVE--ASERHPGH-----YGFSTE-- : 168
Thalassiosira_pseudonana_Rad51-B : --GGAVYIDTE--KKLS--LVRURE--LAMER----- : 117
Phaeodactylum_tricornutum_Rad51-B : --QGCYVYDTE--KKLS--VRRARE--VLRQSSRV--PDNTHGEFLYPSDITLVESTVDISATSRNC-- : 230
Fragilariopsis_cylindrus_Rad51-B : --QCAIYIDSE--KKLS--LPRURE--VSRWKAHG--LQERRRQEQSQSNTIGVGGVGVGTDHHPGRGFANKAAANSFYSYNGSYGSSNSYP : 280
Pseudo-nitzschia_multiseries_Rad51-B : --QCAIYIDTE--KKMS--LEBREGPSTSEELLEVL-- : 212
Pseudo-nitzschia_multistriata_Rad51-B : --QGAHYIDIX--KKMS--LEBREG--SEQRRLIG--NNHESRDEDDMG-- : 223
Seminavis_robusta_Rad51-B : --QGTVYIDTE--QKLS--LVRLOE--VQHQHGNG--QLRKRPRTHEYDDGTTNMEPTTV-- : 196
Arabidopsis_thaliana_Rad51-C : --GKAIYIDTE--GSFM--VRSALQ--AEACVEDM--EYTYGMYMKHFQANQV-- : 178
Oryza_sativa_Rad51-C : --GKAVYIDTE--GSFM--VDRVVS--ATACIQHL--HLIAGHTHEEHQKALK-- : 184
Mus_musculus_Rad51-C : --GEAVYIDTE--GSFM--VDRVVS--ATACIQHL--HLIAGHTHEEHQKALK-- : 184
Homo_sapiens_Rad51-C : --GKAIYIDTE--GSFM--VDRVVD--ATACIQHL--QLIAEKHKGEEHRKALE-- : 184
Danio_riero_Rad51-C : --GKAIYIDTE--GSFL--VORVAD--AEAAVQHC--TLAEDTEQKGALE-- : 176
Chlamydomonas_reinhardtii_Rad51-C : --QCAVYIDTE--GSFM--ABRCAD--AEGAVRHV--QSILEKKASMCQPELLHDGER-- : 184
Micromonas_pusilla_Rad51-C : --GEAVYIDTE--GSFM--ABRAEE--AEATARHL--RSVSNASPEDAGMSDAIA-- : 178
Ostreococcus_lucimarinus_Rad51-C : --GEAVYIDTE--GSFT--ABRAMD--AEALAEHL--GRCAKRCDEDDARREMAALE-- : 183
Ectocarpus_siliculosus_Rad51-C : --GGAIYIDTE--GSLT--VERISQ--CSAVVEHL--QKIARNKRKQGVPDLESA-- : 141
Phaeodactylum_tricornutum_Rad51-C : --GETVYVYDTE--GSFS--PEBCHD--VATSLVQHI--EAGRRRQEQKQKLPMPA-- : 181
Thalassiosira_pseudonana_Rad51-C : --CCSVYIDSE--GSNTGVHGGEPLMT--VAKSLVEHV--RNSAGRMEARRARAADFGGAVDEELVPA-- : 221
Fragilariopsis_cylindrus_Rad51-C : --GRTLIVDAE--GSFV--PERAYS--ADALCDHV--RATTKRRRRRQQQHSQRSQR-- : 130
Pseudo-nitzschia_multiseries_Rad51-C : --GRTLIVDAE--GSFV--ABRAWA--VAGALCRHV--GGTAQRQRKRLRHNNNNSSNNHPA-- : 240
Pseudo-nitzschia_multistriata_Rad51-C : --GRTLIVDAE--GSFS--ADRAWA--VAGALCGHV--GGTARKRRQRKRSKTKTKRSSQSATTSDEKEHEHEHEHETCLPP-- : 266
Seminavis_robusta_Rad51-C : --GTAVYIDTE--GSFS--PEBCYT--VASALVDHV--KKSAEKRKTQCPPTPQ-- : 182
Arabidopsis_thaliana_Xrcc3 : --GSSLYIHSE--FPPF--FRRLHQ--SHTFHQSN--PSIYANYNDNFC-- : 113
Oryza_sativa_Xrcc3 : --ASCFPHSD--LPPF--LRRLRG--LA-----PKSR-- : 116
Mus_musculus_Xrcc3 : --GAVYICTE--DAFP--SKRLWQ--IAQRRRLR-- : 160
Homo_sapiens_Xrcc3 : --GAVYICTE--DAFP--HKRLQQ--MAQQPRLR-- : 160
Danio_riero_Xrcc3 : --SGAVYICTE--DSEF--IKRLRQ--LITQQ--PRLRPDLPPA-- : 166
Micromonas_sp._Xrcc3 : --GAAYVYHTE--GRAP--LALRQ--VSKRQIYS--AH-----LPPD-- : 114
Ostreococcus_lucimarinus_Xrcc3 : --GAAYVYHTE--GPAP--TALMRR--TASSA--RFVAEACDGD-- : 100
Ectocarpus_siliculosus_Xrcc3 : --GKSYVLCGEGDEP--SRRLRQ--VASTYQSRH-- : 148
Thalassiosira_pseudonana_Xrcc3 : --CTSEYITMG--EGIPSSKIAMR--EQ--VRRARENM--HEQCNNAHKVNISNNGNFNTG--RE--EETI-- : 290
Phaeodactylum_tricornutum_Xrcc3 : --LIPCRALYISLK--AQNNVVIVKLEEQ--VLSRQEQR--PASTPDQMKAPT--RSPP-- : 199
Fragilariopsis_cylindrus_Xrcc3 : -----LQHP--SRRLQS--IQSRILTT--TGNNEDRQRNHHQEADD--DRII-- : 102
Pseudo-nitzschia_multiseries_Xrcc3 : --KAVYVVALGSSGRSSLHKAARRRD--LEARTRHQ--ACGGSANGNGKGNNSNTNSNTNSNT--NEWV-- : 108
Pseudo-nitzschia_multistriata_Xrcc3 : --KAVYVVALGSSGRSSLHKAARRRD--LEARTRHQ--ACGGSANGNGKGNNSNTNSNTNSNT--NEWV-- : 108
Seminavis_robusta_Xrcc3 : --CRAVYISLSG--GQASLSRIAYR--EQ--TANQKQSQCKDNSATNYPICNQQLPGSALHGPTTSDQ-- : 222
Sulfolobus_solfataricus_Rad-A : --GKAVYIDTE--GTFR--WEREEN--VAKAL-- : 151
Aeropyrum_pernix_Rad-A : --GKAVYIDTE--GTFR--WEREQ--VARGV-----GLDP-- : 151
e          r

```

```

*          420          *          440          *          460          *          480          *          500
Arabidopsis_thaliana_Dmcl : -----GAVI-----DNIIYARA--YTYEHQYNL--LGLAAK--SEEP----- : 184
Oryza_sativa_Dmcl : -----NAVI-----DNIIYARA--YTYEHQYNL--LGLAAK--AEPP----- : 184
Mus_musculus_Dmcl : -----EAVI-----DNIIYARA--YTSEHQMELL--DYVAAKFHEEA----- : 184
Homo_sapiens_Dmcl : -----DAVI-----DNIIYARA--YTSEHQMELL--DYVAAKFHEEA----- : 184
Danio_riero_Dmcl : -----EAVI-----DNIIYARA--YTSEHQMELL--DFVAAKFHEEG----- : 184
Ectocarpus_siliculosus_Dmcl : -----FC-----RRWWWKMSCLPLPPEKRTFQSTAAALCLTEG----- : 173
Oryza_sativa_Rad51-A : -----ADVI-----ENIIYARA--YNTDHQSRLL--LEAASMIETR----- : 184
Arabidopsis_thaliana_Rad51-A : -----ADVI-----ENIIYARA--YNTDHQSRLL--LEAASMIETR----- : 184
Mus_musculus_Rad51-A : -----SDVI-----DNIIYARG--FNTDHQTQLL--YQASAM--VESR----- : 184
Homo_sapiens_Rad51-A : -----SDVI-----DNIIYARA--FNTDHQTQLL--YQASAM--VESR----- : 184
Danio_riero_Rad51-A : -----SDVI-----DNIIYARA--FNTDHQTQLL--YQASAM--TESR----- : 184
Chlamydomonas_reinhardtii_Rad51-A : -----EDVI-----NNIIYARA--HNTEHQMRLI--QEAAGM--ADSR----- : 184
Micromonas_sp._Rad51-A : -----NAVI-----DNIIYAKA--HNTEHQSELI--VAAAGM--AEAR----- : 184
Ostreococcus_lucimarinus_Rad51-A : -----SAVI-----DNIIYAKA--HNVEHQSELI--LAAAGM--AETR----- : 184
Ectocarpus_siliculosus_Rad51-A : -----DDVI-----ENIIYARA--HNSEQMDLI--KMASAM--AEDR----- : 184
Phaeodactylum_tricornutum_Rad51-A : -----TVAI-----ENIIYARA--HNSEQAELI--KLAAMI--SQDR----- : 184
Thalassiosira_pseudonana_Rad51-A : -----SVAL-----ENIIYARA--HNSEQMELI--KMAAII--SQDR----- : 184
Fragilariopsis_cylindrus_Rad51-A2 : -----VATI-----ENIIYARA--HNSEQMELI--KVAAMI--SQDR----- : 184
Fragilariopsis_cylindrus_Rad51-A1 : -----KLTI-----ENIIYARA--HNSEQMELI--KVAAMI--AQDR----- : 184
Pseudo-nitzschia_multiseries_Rad51-A2 : -----AVVI-----ENIIACARA--HNSEQMELI--KVAAMI--SQDR----- : 184
Pseudo-nitzschia_multiseries_Rad51-A1 : -----AVAI-----ENIIACARA--HNSEQMELI--KVAAMI--AQDR----- : 184
Pseudo-nitzschia_multistriata_Rad51-A2 : -----AVVI-----ENIIACARA--HNSEQMELI--KVAAMI--SQDR----- : 184
Pseudo-nitzschia_multistriata_Rad51-A1 : -----TVAI-----ENIIACARA--QNSEQMELI--KTAAMI--AQDR----- : 184
Seminavis_robusta_Rad51-A : -----NLAI-----ENIIYARA--QNSEQMELI--KMAAII--SQDR----- : 135
Arabidopsis_thaliana_Rad51-B : -----QEMA-----GRILVLRP--TSLANFTESI--QELKNS--LQNG----- : 195
Oryza_sativa_Rad51-B : -----QKMA-----GRILVLRP--TSLSEFTKSI--EQMKVT--LQHD----- : 193
Mus_musculus_Rad51-B : -----EKLI-----LTSRR--HLCRE--LTCGGLLQR--ESLEEE--ISKG----- : 194
Homo_sapiens_Rad51-B : -----EKLI-----LTSRR--HLYRE--LTCDEVLQR--ESLEEE--ISKG----- : 194
Danio_riero_Rad51-B : -----ERLI-----EMAAR--HLFRE--LTCQDVLKR--ERLEED--IACR----- : 190
Chlamydomonas_reinhardtii_Rad51-B : -----GEVI-----RRIVVSTP--GSTEQLMQT--ENLQHT--LQYR----- : 205
Micromonas_pusilla_Rad51-B : -----TTLT-----SRILVLTLP--STLSEILQR--NGLEEA--IDHG----- : 233
Ostreococcus_lucimarinus_Rad51-B : -----HALA-----RRIVVSTP--TSLTDLNKR--DALEEA--IDHK----- : 188
Ectocarpus_siliculosus_Rad51-B : -----ERLI-----NQIVVFPV--DNSAALVDR--ETLQAR--IESN----- : 201
Thalassiosira_pseudonana_Rad51-B : -----NTMQLP----- : 124
Phaeodactylum_tricornutum_Rad51-B : -----QEVI-----DNIIYVHSP--SNIDELFGAI--SEVEDE--FSRN----- : 263
Fragilariopsis_cylindrus_Rad51-B : -----GNILHTLP--GSSSELLDVI--DALEDE--LQNR----- : 357
Pseudo-nitzschia_multiseries_Rad51-B : -----YELI-----IRNQTAGQAFLESG--AESAGTTTNA--TSTHTHTHTHT----- : 251
Pseudo-nitzschia_multistriata_Rad51-B : -----QLVI-----NNIVVHQP--ENTDELLQVI--DGLLEYE--LIRNQAGQAFFQSGASTDINT----- : 274
Seminavis_robusta_Rad51-B : -----QQVI-----DNIIYVLSF--TSPDPLMTAL--LQIEEL--VLDQA----- : 229
Arabidopsis_thaliana_Rad51-C : -----EDII-----ENIIYFRV--CSYTEQIALV--NHLEKF--SENK----- : 211
Oryza_sativa_Rad51-C : -----ESFI-----ADIIYFRI--CSYTEQIAVI--NYLEKF--GEHK----- : 217
Mus_musculus_Rad51-C : -----ENII-----SHIIYFRC--HDYTELLAQV--YLLPDI--SDHP----- : 217
Homo_sapiens_Rad51-C : -----DNII-----SHIIYFRC--RDYTELLAQV--YLLPDI--SEHS----- : 217
Danio_riero_Rad51-C : -----EKII-----SNIIYVRC--HDYVKLLAEV--YLLPDI--SEHP----- : 209
Chlamydomonas_reinhardtii_Rad51-C : -----ENVI-----RGIYLFVR--HDHVEQLGLV--NMLPRF--EQYS----- : 217
Micromonas_pusilla_Rad51-C : -----ERMI-----ERVIHLFRC--HEVTELLAVI--EALPAY--KKHR----- : 211
Ostreococcus_lucimarinus_Rad51-C : -----EAMI-----RGIHLFRC--HEVTELLAAV--ETLGEF--AERP----- : 216
Ectocarpus_siliculosus_Rad51-C : -----EAFI-----GGIHVWRL--HDHAEQLAAV--RTLPEF--VAHP----- : 174
Phaeodactylum_tricornutum_Rad51-C : -----DTII-----QGIHVYRV--HDEAAQTSVI--YSLPKF--QDRQ----- : 214
Thalassiosira_pseudonana_Rad51-C : -----ESTI-----EGIHFVRV--HDEPSTCTI--YSLPQF--MEQE----- : 254
Fragilariopsis_cylindrus_Rad51-C : -----EDII-----DSIDVFRV--HDETALLATI--YSLQKYNSTA----- : 163
Pseudo-nitzschia_multiseries_Rad51-C : -----EGII-----GSDVFRV--HDETALLATI--YSLQHH--EIAN----- : 278
Pseudo-nitzschia_multistriata_Rad51-C : -----EGII-----ASIDVFRV--HDEAALLATI--YSLGDR--GEAS----- : 299
Seminavis_robusta_Rad51-C : -----NTII-----QGIHVFRV--HDEAAQMSIV--MGLPDI--RDQE----- : 215
Arabidopsis_thaliana_Xrcc3 : -----DHIIFQNV--HSVDHLFDIV--PRIDGF--GNSK----- : 142
Oryza_sativa_Xrcc3 : -----PDLI-----DHILVAAA--HSPSDLISLI--SRAQRL--AHFG----- : 149
Mus_musculus_Xrcc3 : -----EELI-----EKIRFNSNH--FIEHA--ADVDTLLEC--SKKVPIL--SRGM----- : 200
Homo_sapiens_Xrcc3 : -----GELI-----QKLRFGSQI--FIEHV--ADVDTLLEC--NKKVPVL--SRGM----- : 200
Danio_riero_Xrcc3 : -----LRFS-----DNIIYIEHA--ADLEALQVC--SQRVPL--KRGV----- : 200
Micromonas_sp._Xrcc3 : -----HDFI-----DYIYLVKLTLEDPESELWDAL--ASVADV--TDPV----- : 149
Ostreococcus_lucimarinus_Xrcc3 : -----TAAI-----ERVIYVKAL--GDADALRETI--TAVSAV--RAPV----- : 134
Ectocarpus_siliculosus_Xrcc3 : -----EKLI-----EGVICQNA--KTLDDQMMI--MEHLPHI--RSQN----- : 182
Thalassiosira_pseudonana_Xrcc3 : -----KQII-----SRHWLLSI--RNEEFIELVESHLPQM--EQQR----- : 340
Phaeodactylum_tricornutum_Xrcc3 : -----CTII-----QRILTRAA--WNAEQLTQVI--DELVPL--KSGT----- : 232
Fragilariopsis_cylindrus_Xrcc3 : -----HDCI-----TRILVIRWI--CNSEDLMDLI--TTNLDRL--HHHP----- : 136
Pseudo-nitzschia_multiseries_Xrcc3 : -----HECI-----TRILVHVW--CNTEELTEV--QTRLPAL--RKHH----- : 142
Pseudo-nitzschia_multistriata_Xrcc3 : -----HDCI-----SRILVHWI--CNSEDLMDL--RTKLPRL--RMNN----- : 256
Seminavis_robusta_Xrcc3 : -----ASVI-----POLLTHSV--RNHEDLFAL--REDLPHC--KGDG----- : 276
Sulfolobus_solfataricus_Rad-A : -----DNVI-----NNIIYIRA--INTDHQIAIV--DDLQEL--SKDP----- : 184
Aeropyrum_pernix_Rad-A : -----DEVI-----KNIIYIRA--INSHQIAIV--DKLPTM--KNDN----- : 184

```

```

*          520          *          540          *          560          *          580          *          600
Arabidopsis_thaliana_Dmcl1 : -----FRLLVDSVIALFR-----VD-----FTG-----RGLAD-----RQOKLAQMLSRIRKAEFFNVA : 231
Oryza_sativa_Dmcl1 : -----FRLLVDSVIALFR-----VD-----FSG-----RGLAE-----RQOKLAQMLSRIRKAEFFNVA : 231
Mus_musculus_Dmcl1 : -----GIFKLLVDSIMALFR-----VD-----FSG-----RGLAE-----RQOKLAQMLSRIRKAEFFNVA : 233
Homo_sapiens_Dmcl1 : -----GIFKLLVDSIMALFR-----VD-----FSG-----RGLAE-----RQOKLAQMLSRIRKAEFFNVA : 233
Danio_riero_Dmcl1 : -----GVFKLLVDSIMALFR-----VD-----FSG-----RGLAE-----RQOKLAQMLSRIRKAEFFNVA : 233
Ectocarpus_siliculosus_Dmcl1 : -----PIRVIIIVDSVIALFR-----VD-----FSG-----RGDSV-----RQOKLGRHLSLQVADSLNVA : 221
Oryza_sativa_Rad51-A : -----FALMIVDSATALYR-----TD-----FSG-----RGLSA-----RQMHAKFLRSRQKPADEFGVA : 231
Arabidopsis_thaliana_Rad51-A : -----FALLVDSATALYR-----TD-----FSG-----RGLSA-----RQMHAKFLRSRQKPADEFGVA : 231
Mus_musculus_Rad51-A : -----YALLVDSATALYR-----TD-----YSG-----RGLSA-----RQMHARFLRMLLRPADEFGVA : 231
Homo_sapiens_Rad51-A : -----YALLVDSATALYR-----TD-----YSG-----RGLSA-----RQMHARFLRMLLRPADEFGVA : 231
Danio_riero_Rad51-A : -----YALLVDSATALYR-----TD-----YSG-----RGLSA-----RQMHARFLRMLLRPADEFGVA : 231
Chlamydomonas_reinhardtii_Rad51-A : -----FSVVVDSATALYR-----TE-----FNG-----RGLSI-----RQILHGRFLRMLLRPADEFGVA : 231
Micromonas_sp._Rad51-A : -----FGVIIIVDSVTLNFR-----TE-----YEG-----RGLSA-----RQMHGKFLRMLLRPADEFGVA : 231
Ostreococcus_lucimarinus_Rad51-A : -----FSEMIIVDSVTLNFR-----TE-----YEG-----RGLSA-----RQMHGKFLRMLLRPADEFGVA : 231
Ectocarpus_siliculosus_Rad51-A : -----YALLVDSATALYR-----TD-----YCG-----RGLSE-----RQMHARFLRMLLRPADEFGVA : 231
Phaeodactylum_tricornutum_Rad51-A : -----YALLVDSATALFR-----TD-----YTG-----RGLSE-----RQMHARFLRMLLRPADEFGVA : 231
Thalassiosira_pseudonana_Rad51-A : -----YALIIVDSATALFR-----TD-----YSG-----RGLSE-----RQMHARFLRMLLRPADEFGVA : 231
Fragilariopsis_cylindrus_Rad51-A2 : -----YALLVDSATALYR-----TD-----YTG-----RGLSE-----RQMHARFLRMLLRPADEFGVA : 231
Fragilariopsis_cylindrus_Rad51-A1 : -----YALLVDSATALYR-----TD-----YTG-----RGLSE-----RQMHARFLRMLLRPADEFGVA : 231
Pseudo-nitzschia_multiseriata_Rad51-A2 : -----YALLVDSATALFR-----TD-----YTG-----RGLSE-----RQMHARFLRMLLRPADEFGVA : 231
Pseudo-nitzschia_multiseriata_Rad51-A1 : -----YALLVDSATALFR-----TD-----YTG-----RGLSE-----RQMHARFLRMLLRPADEFGVA : 231
Pseudo-nitzschia_multiseriata_Rad51-A2 : -----YALLVDSATALFR-----TD-----YTG-----RGLSE-----RQMHARFLRMLLRPADEFGVA : 231
Pseudo-nitzschia_multiseriata_Rad51-A1 : -----YALLVDSATALFR-----TD-----YTG-----RGLSE-----RQMHARFLRMLLRPADEFGVA : 231
Seminavis_robusta_Rad51-A : -----YALLVDSATALFR-----TD-----YTG-----RGLSE-----RQMHARFLRMLLRPADEFGVA : 182
Arabidopsis_thaliana_Rad51-B : -----VKLLVDSITALLS-----GE-----KPGAQ-----RQPGWHIATFKRAEFLRTP : 239
Oryza_sativa_Rad51-B : -----VKLLVDSMAALYS-----SE-----IEK-----SA-TGL-----RQPHRWFALSFKRAEFLRTP : 239
Mus_musculus_Rad51-B : -----VKLVVDSIASVVR-----KE-----FDP-----KLGQNK-----RQKFKGKASLKYAGBESFP : 243
Homo_sapiens_Rad51-B : -----IKLVVDSIASVVR-----KE-----FDA-----QLQGNLKE-----RQKFKGKASLKYAGBESFP : 243
Danio_riero_Rad51-B : -----AGLVVDSIASVVR-----KE-----FDT-----SLPGLNLT-----RQNFVQEAVALKYAGBESFP : 239
Chlamydomonas_reinhardtii_Rad51-B : -----ARLVVDSIAAALR-----TEYGNPSSSGASGSVAGGG-----GLVGSIMD-----RQVQVGRVIASTFKRAEFLRTP : 269
Micromonas_pusilla_Rad51-B : -----VRLVVDMAAALR-----AE-----FG-----RGLQ-----RQELGGIASVFKQAEFLRTP : 279
Ostreococcus_lucimarinus_Rad51-B : -----VRLVVDIAHLAR-----AE-----FG-----REKVVQ-----RQSAAGAVASTFKRAEFLRTP : 234
Ectocarpus_siliculosus_Rad51-B : -----FRLLVDSIAAALR-----RD-----FAR-----EDTIS-----RQELTRQAAVKRPAETFSAV : 247
Thalassiosira_pseudonana_Rad51-B : -----VKLVVDSIAAPVR-----RD-----FDMSSSSTSKFSPNAAQ-----BASFFQVARKKQVTHDHHVA : 181
Phaeodactylum_tricornutum_Rad51-B : -----HQSVGSSNAKFPVRLVDSIAAPAR-----RD-----FGA-----LASTIKIAQTKRAEFLRTP : 321
Fragilariopsis_cylindrus_Rad51-B : -----SVVENINTRNNVKGKYPVRLVDSIASPMP-----RD-----FGT-----DSAPQ-----RASAFCQAKKRAEFLRTP : 420
Pseudo-nitzschia_multiseriata_Rad51-B : -----HNKTAVRGKYPVRLVDSIAAPMP-----RD-----FGT-----DS-APQ-----RAAAFCQAKKRAEFLRTP : 308
Pseudo-nitzschia_multiseriata_Rad51-B : -----SLSNTAVRGKYPVRLVDSIAAPMP-----RD-----YGT-----DS-APQ-----RAASFCQAKKRAEFLRTP : 332
Seminavis_robusta_Rad51-B : -----HDNSNNKLPICGLVDSIAAPAK-----RG-----AESAP-----RAAAFCQAKKRAEFLRTP : 282
Arabidopsis_thaliana_Rad51-C : -----DVKVIVDSITFFHR-----QD-----YDD-----LAQ-----RFRVSSMALKFKRAEFLRTP : 256
Oryza_sativa_Rad51-C : -----DVRVIVDSITFFHR-----QD-----FDD-----MAL-----RFRVSSMALKFKRAEFLRTP : 262
Mus_musculus_Rad51-C : -----KVQVIVDSITFFHR-----HD-----LED-----LSL-----RFRVSSMALKFKRAEFLRTP : 262
Homo_sapiens_Rad51-C : -----KVRVIVDSITFFHR-----HD-----LDD-----LSL-----RFRVSSMALKFKRAEFLRTP : 262
Danio_riero_Rad51-C : -----EVRVIVDSITFFHR-----HD-----FED-----LSQ-----RFRVSSMALKFKRAEFLRTP : 254
Chlamydomonas_reinhardtii_Rad51-C : -----QVRVIVDSITFFHR-----QD-----FPD-----MAQ-----RFRVSSMALKFKRAEFLRTP : 262
Micromonas_pusilla_Rad51-C : -----VRLVVDVSAFHR-----QD-----FRD-----MAL-----RFTIILAKMTQRQVASENVA : 255
Ostreococcus_lucimarinus_Rad51-C : -----KVRVIVDSVAFHR-----QD-----FQD-----MAL-----RFTIILAKMTQRQVASENVA : 261
Ectocarpus_siliculosus_Rad51-C : -----EVKLVVDSVAFHR-----HA-----RQD-----MSV-----RFRVSSMALKFKRAEFLRTP : 219
Phaeodactylum_tricornutum_Rad51-C : -----EAGTPVRLVVDMAFHR-----AA-----PP-----NSDFVG-----RFRVSSMALKFKRAEFLRTP : 265
Thalassiosira_pseudonana_Rad51-C : -----EKGHPVKLLVDSIAFHR-----VANTSTSSNNNGGGGNNN-----RNNLS-----RTHNTRMSTTEASEEDVA : 321
Fragilariopsis_cylindrus_Rad51-C : -----NNSSSSSPLVRLVDSIAFHR-----AV-----TPTD-----SSYYVQ-----RFTKTTALAAYGDEASKHVA : 222
Pseudo-nitzschia_multiseriata_Rad51-C : -----NASTTSSTSTTTTNYLFPVRLVDSIAFHR-----AV-----TPTD-----SSYYVQ-----RFTKTTALAAYGDEASKHVA : 343
Pseudo-nitzschia_multiseriata_Rad51-C : -----STKGLFPVRLVDSIAFHR-----AA-----SPTD-----PSYLR-----RFTKTTAGLAGYGDARRHVA : 354
Seminavis_robusta_Rad51-C : -----QGGSPVKAVVDSIAFHR-----CA-----PPGQ-----N-YLA-----RFRVSSMALKFKRAEFLRTP : 266
Arabidopsis_thaliana_Xrcc3 : -----TRFPLKIVDSVAALEFR-----SE-----FDN-----TPSDLK-----RSSLFFKISGKQVASKEDVA : 194
Oryza_sativa_Xrcc3 : -----RLPPVRLVDSIASLFR-----AD-----FDA-----SPADLKR-----RQALFFRISAKKEAHRRCV : 201
Mus_musculus_Xrcc3 : -----ARLVVDSIAAPFR-----CE-----FHL-----QASAI-----RAKLLSLGATRRSSSTRSP : 246
Homo_sapiens_Xrcc3 : -----ARLVVDSVAAAPFR-----CE-----FDS-----QASAP-----RARRHQLSGAMRESSAFQSP : 246
Danio_riero_Xrcc3 : -----VRLVVDVAALEFR-----SE-----FQA-----DEAVQ-----RFRVSSMALKFKRAEFLRTP : 246
Micromonas_sp._Xrcc3 : -----GGPRRPVRLVDSVSSPFR-----ET-----DAST-----KECVFE-----RFTGISRVAALSEYAHRAVA : 203
Ostreococcus_lucimarinus_Xrcc3 : -----SEDVVRVIVDSIAAPFR-----DD-----ATNGG-----WTYAAK-----RAGAHKLTMLKEYATKHDVA : 188
Ectocarpus_siliculosus_Xrcc3 : -----VKLVVDSIAAALR-----SD-----MGR-----GRGDIGE-----RFRVSSMALKFKRAEFLRTP : 230
Thalassiosira_pseudonana_Xrcc3 : -----HHHQNEQQPADPISARIGHAFAGIAGFFR-----SD-----PLLSFTT-----SKSSNSLFHRQ-----RSSLFFKISGKQVASKEDVA : 414
Phaeodactylum_tricornutum_Xrcc3 : -----VRLVVDIAFMETS-----ED-----TDG-----TRSQSSHHHAASAI-----FGLAARFKKSDVDFVP : 287
Fragilariopsis_cylindrus_Xrcc3 : -----TISMVVLDGIANLFR-----FLPEYESQSSSQQQQQQQQQNNN-----NNPWHH-----RAITFFQISNLCKE-----SSKYBVP : 205
Pseudo-nitzschia_multiseriata_Xrcc3 : -----PAVSVVLDGIANLFR-----LRPEHGSHGNDNGSGNGI-----ASPWH-----RAVAVFRLSNACKA-----SSRFVVP : 206
Pseudo-nitzschia_multiseriata_Xrcc3 : -----RTVSEVLDGIANLFR-----LLPE-QD-----HFCSTRGYDID-----KNPWH-----RAVTFQISNLCKE-----SSKYBVP : 318
Seminavis_robusta_Xrcc3 : -----QLPGGFPGDTTQQPHVAVVLDSTADLFR-----LG-----NSD-----ESDVEKGAALK-----RSLVFLSALIKASQVQVP : 345
Sulfolobus_solfataricus_Rad-A : -----SIRKIVDSVTSFR-----AE-----YPG-----REILAV-----RQOKNKHHLQVTRAEVYDVA : 232
Aeropyrum_pernix_Rad-A : -----IKLVVDSVTSFR-----AE-----FPG-----RENLAM-----RQOLNKRHLQVTRAEVYDVA : 231

```

|                                        | * | 620                                                            | * | 640                   | * | 660                         | * | 680              | *             | 700                     |         |     |
|----------------------------------------|---|----------------------------------------------------------------|---|-----------------------|---|-----------------------------|---|------------------|---------------|-------------------------|---------|-----|
| Arabidopsis_thaliana_Dmcl              | : | VYVITNOVIADP                                                   |   | -G-----               |   | GGMFISDPKKFAG               |   | HVLHAHAATIRL     | LF            | -RKGKG                  | 276     |     |
| Oryza_sativa_Dmcl                      | : | VYVITNOVIADPG                                                  |   | -----                 |   | GGMFIIDLKKPAG               |   | HVLHAHAATIRL     | LM            | -----                   | 276     |     |
| Mus_musculus_Dmcl                      | : | VYVITNOVMTADP                                                  |   | -GA-----              |   | TMTFQADPKKFIG               |   | SHLHAHASTTRIS    | SL            | -RKGRGE                 | 279     |     |
| Homo_sapiens_Dmcl                      | : | VYVITNOVMTADP                                                  |   | -GA-----              |   | TMTFQADPKKFIG               |   | SHLHAHASTTRIS    | SL            | -RKGRGE                 | 279     |     |
| Danio_rerio_Dmcl                       | : | VYVITNOVMTADP                                                  |   | -GA-----              |   | TMTFQADPKKFIG               |   | SHLHAHASTTRIS    | SL            | -RKGRGE                 | 279     |     |
| Ectocarpus_siliculosus_Dmcl            | : | VYVITNOVCMSSDP                                                 |   | -----                 |   | GAMAMFATVKEVFG              |   | HVLHAHASTTRVHL   | HL            | -KKGRGE                 | 265     |     |
| Oryza_sativa_Rad51-A                   | : | VYVITNOVVAQV                                                   |   | -DG-----              |   | SAMFAGPQIKFIG               |   | SNIMAHASTTRIAL   | AL            | -RKGRGE                 | 277     |     |
| Arabidopsis_thaliana_Rad51-A           | : | VYVITNOVVAQV                                                   |   | -DG-----              |   | SALFAGPQFKFIG               |   | SNIMAHASTTRIAL   | AL            | -RKGRGE                 | 277     |     |
| Mus_musculus_Rad51-A                   | : | VYVITNOVVAQV                                                   |   | -DG-----              |   | AAMFAADPKKFIG               |   | SNIAHASTTRLYL    | YL            | -RKGRGE                 | 277     |     |
| Homo_sapiens_Rad51-A                   | : | VYVITNOVVAQV                                                   |   | -DG-----              |   | AAMFAADPKKFIG               |   | SNIAHASTTRLYL    | YL            | -RKGRGE                 | 277     |     |
| Danio_rerio_Rad51-A                    | : | VYVITNOVVAQV                                                   |   | -DG-----              |   | AAMFADPKKFIG                |   | SNILAHASTTRLYL   | YL            | -RKGRGE                 | 277     |     |
| Chlamydomonas_reinhardtii_Rad51-A      | : | VYVITNOVVANP                                                   |   | -DGA-----             |   | GAMFAGPQTKFIG               |   | SNIMAHASTTRISV   | SV            | -RKGRGE                 | 278     |     |
| Micromonas_sp._Rad51-A                 | : | VYVITNOVVANP                                                   |   | -DGN-----             |   | AMFAGANALKEFIG              |   | SNIMAHASTTRIAL   | AL            | -RKGRGE                 | 278     |     |
| Ostreococcus_lucimarinus_Rad51-A       | : | VYVITNOVVANP                                                   |   | -EG-----              |   | GFAGANALKEFIG               |   | SNIMAHASTTRIAL   | AL            | -RKGRGE                 | 277     |     |
| Ectocarpus_siliculosus_Rad51-A         | : | VYVITNOVVANP                                                   |   | -D-----               |   | GMSFAKDSTKEFIG              |   | SNIAHASTTRLYL    | YL            | -RKARGD                 | 276     |     |
| Phaeodactylum_tricornutum_Rad51-A      | : | VYVITNOVVANP                                                   |   | -D-----               |   | GMSFAKDSTKEFIG              |   | SNIMAHASTTRIAL   | AL            | -RKGRGD                 | 276     |     |
| Thalassiosira_pseudonana_Rad51-A       | : | VYVITNOVVANP                                                   |   | -D-----               |   | GMSFAKDSTKEFIG              |   | SNIVAHASTTRIAL   | AL            | -RKGRGE                 | 276     |     |
| Fragilariopsis_cylindrus_Rad51-A2      | : | VYVITNOVSDP                                                    |   | -G-----               |   | AMSFADKSTKEFIG              |   | SNIAHASTTRIAL    | AL            | -RKGRGD                 | 276     |     |
| Fragilariopsis_cylindrus_Rad51-A1      | : | VYVITNOVSDP                                                    |   | -G-----               |   | AMSFADKATKEFIG              |   | SNIAHAATTRIAL    | AL            | -RKGRGD                 | 276     |     |
| Pseudo-nitzschia_multiseriata_Rad51-A2 | : | VYVITNOVVANP                                                   |   | -D-----               |   | GMSFAKDSTKEFIG              |   | SNIAHASTTRIAL    | AL            | -RKGRGE                 | 276     |     |
| Pseudo-nitzschia_multiseriata_Rad51-A1 | : | VYVITNOVVANP                                                   |   | -D-----               |   | GMSFAKDSTKEFIG              |   | SNIAHASTTRIAL    | AL            | -RKGRGE                 | 276     |     |
| Pseudo-nitzschia_multistriata_Rad51-A2 | : | VYVITNOVVANP                                                   |   | -D-----               |   | GMSFAKDSTKEFIG              |   | SNIAHASTTRIAL    | AL            | -RKGRGE                 | 276     |     |
| Pseudo-nitzschia_multistriata_Rad51-A1 | : | VYVITNOVVANP                                                   |   | -D-----               |   | GMSFAKDSTKEFIG              |   | SNIAHASTTRIAL    | AL            | -RKGRGE                 | 276     |     |
| Seminavis_robusta_Rad51-A              | : | VYVITNOVVANP                                                   |   | -D-----               |   | GMSFAKDSTKEFIG              |   | SNIAHASTTRIAL    | AL            | -RKGRGE                 | 227     |     |
| Arabidopsis_thaliana_Rad51-B           | : | VYVITNOVRSQNRDE                                                |   | -TSQYSFQAKVKDFKD      |   | NTKYDLSHLVAAL               |   | GNWAHCVSTRVYL    | VL            | -EAKSG                  | 301     |     |
| Oryza_sativa_Rad51-B                   | : | VYVITNOVRSQSNDD                                                |   | -GYRYSFEVEKKYD-SN     |   | NAEGFESHLVAAL               |   | GIQWAHVTIRVYF    | VF            | -EAHSG                  | 300     |     |
| Mus_musculus_Rad51-B                   | : | VYVITNOITTHL                                                   |   | -----                 |   | SGALPSQADLVSPAD             |   | DLSEGTSGSSCVIAAL | NTWGHCVSTRVYL | VL                      | -QYLDSE | 307 |
| Homo_sapiens_Rad51-B                   | : | VYVITNOITTHL                                                   |   | -----                 |   | SGALPSQADLVSPAD             |   | DLSEGTSGSSCVIAAL | NTWGHCVSTRVYL | VL                      | -QYLDSE | 307 |
| Danio_rerio_Rad51-B                    | : | VYVITNOITTHV                                                   |   | -GEKLCPCQWNQTD        |   | SFEEDSFEVTAAL               |   | GNWHSVSTRVYL     | VL            | -QYEDSE                 | 297     |     |
| Chlamydomonas_reinhardtii_Rad51-B      | : | VYVITNOVTRTRI                                                  |   | -----                 |   | PGSAAKGLTAAAL               |   | CAKWAHCVSTRVYL   | VL            | -EAKLQ                  | 322     |     |
| Micromonas_pusilla_Rad51-B             | : | VYVITNOVTRTRIGAAAGHDTGPGAGREGDGGGGIGGGGGGAERDAGSRDAGSGSGSVTAAL |   | TKWAHCVSTRVYL         |   | EGAAAGGDADAAGGG             |   | -----            |               | 370                     |         |     |
| Ostreococcus_lucimarinus_Rad51-B       | : | VYVITNOVTTKI                                                   |   | -GTFARHADSGD          |   | DVADESSGITAAL               |   | TKWAHCVSTRVYL    | VL            | -EVLED                  | 289     |     |
| Ectocarpus_siliculosus_Rad51-B         | : | VYVITNOVTTSF                                                   |   | -YPTSLGQGG            |   | RQSIASHNTSSSREGKSAFETEDRMVM |   | -----            |               | RRG                     | 298     |     |
| Thalassiosira_pseudonana_Rad51-B       | : | VYVITNOVSGSG                                                   |   | -SDFRNNPQRNN          |   | TLDIRDGEFTASL               |   | GTAWQCVSTRVYL    | VL            | -EHEDDPHKLAQEQDQCH      | 248     |     |
| Phaeodactylum_tricornutum_Rad51-B      | : | VYVITNOVGSII                                                   |   | -LGT-----             |   | DAVIDGTGIRPAL               |   | GTSWHHCVSTRVYL   | VL            | -EPEADLVSSSLNSDGP       | 382     |     |
| Fragilariopsis_cylindrus_Rad51-B       | : | VYVITNOVGSDS                                                   |   | -----                 |   | RAAL                        |   | GTSWHHCVSTRVYL   | VL            | -ETATATSDANKILD         | 469     |     |
| Pseudo-nitzschia_multiseriata_Rad51-B  | : | VYVITNOVGAAGGGVGVGD                                            |   | -GRAGNIGIGTNPAGM      |   | SSEQRI PVRAAL               |   | GTSWHHCVSTRVYL   | VL            | -ETSTVGVVPTAPELSGF      | 390     |     |
| Pseudo-nitzschia_multistriata_Rad51-B  | : | VYVITNOVGAASVDSNAM                                             |   | -KNRSENKNDISGFL       |   | NAEQHPNSVRAAL               |   | GTSWHHCVSTRVYL   | VL            | -EALNIPNFMPSPPELSSLGNT  | 412     |     |
| Seminavis_robusta_Rad51-B              | : | VYVITNOVVALER                                                  |   | -----                 |   | SNFGSGVRVKAAL               |   | GTSWHHCVSTRVYL   | VL            | -EQQQQLEQQPQQQSGSPFV    | 340     |     |
| Arabidopsis_thaliana_Rad51-C           | : | VYVITNOVTTKF                                                   |   | -----                 |   | SEGSFQALAL                  |   | SDSWHSCSTRVYL    | VL            | -YV-NGD                 | 297     |     |
| Oryza_sativa_Rad51-C                   | : | VYVITNOVTTKF                                                   |   | -----                 |   | TEGSFQTLAL                  |   | SDSWHSCSTRVYL    | VL            | -YV-NGN                 | 303     |     |
| Mus_musculus_Rad51-C                   | : | VYVITNOVTTKI                                                   |   | -----                 |   | DKNQALLVPAL                 |   | GESWHAATIRL      | LF            | -HWEQK                  | 303     |     |
| Homo_sapiens_Rad51-C                   | : | VYVITNOVTTKI                                                   |   | -----                 |   | DRNQALLVPAL                 |   | GESWHAATIRL      | LF            | -HWDRK                  | 303     |     |
| Danio_rerio_Rad51-C                    | : | VYVITNOVTRV                                                    |   | -----                 |   | SNQSKLVLPAL                 |   | GESWHAATIRL      | LF            | -HW-EGQ                 | 295     |     |
| Chlamydomonas_reinhardtii_Rad51-C      | : | VYVITNOVTTKV                                                   |   | -----                 |   | LEGGSKLVLPAL                |   | GESWHAATIRL      | LF            | -TWGPDN                 | 305     |     |
| Micromonas_pusilla_Rad51-C             | : | VYVITNOVTVKP                                                   |   | -----                 |   | DPRGGGARLVLPAL              |   | GESYAHACTTRVIL   | IL            | -SWEDD                  | 298     |     |
| Ostreococcus_lucimarinus_Rad51-C       | : | VYVITNOVTVKP                                                   |   | -----                 |   | QRDGSARLVLPAL               |   | GESYAHACTTRVIL   | IL            | -SWEND                  | 303     |     |
| Ectocarpus_siliculosus_Rad51-C         | : | VYVITNOVTTKV                                                   |   | -M-----               |   | TGRHGESLVLPAL               |   | GESWAHAATIRL     | LF            | -LW-KGQ                 | 263     |     |
| Phaeodactylum_tricornutum_Rad51-C      | : | VYVITNOVTTKM                                                   |   | -----                 |   | TEASEAKQVPAL                |   | GESWAHAATIRL     | LF            | -SRPISDTNG              | 311     |     |
| Thalassiosira_pseudonana_Rad51-C       | : | VYVITNOVTTKI                                                   |   | -EKD-----             |   | ENGNSTTKLVLPAL              |   | GESWAHVSSTRVIL   | VL            | -MDHYHRVNGSTLPIEMEE     | 380     |     |
| Fragilariopsis_cylindrus_Rad51-C       | : | VYVITNOVTTKVS                                                  |   | -NYNNNSHQSSFS         |   | SSSSSTVLVPAL                |   | GESWAHATATIRL    | LF            | -SNEEQYVVPVATGADGNSD    | 298     |     |
| Pseudo-nitzschia_multiseriata_Rad51-C  | : | VYVITNOVTTKVVMD                                                |   | -GNNYGNGTGNGNGNG      |   | GTGLSVSVVPAL                |   | GESWAHATATIRL    | LF            | -SRDEGSHDNEHNDGRDGDDE   | 420     |     |
| Pseudo-nitzschia_multistriata_Rad51-C  | : | VYVITNOVTTMRH                                                  |   | -GHGHGHGQSSNGSG       |   | SSNPSDALVVPAL               |   | GESWAHATATIRL    | LF            | -SREXQWGGTRGRNENENENHND | 434     |     |
| Seminavis_robusta_Rad51-C              | : | VYVITNOVTTKV                                                   |   | -ATTA-----            |   | NTTDESVLVPAL                |   | GESWAHATATIRL    | LF            | -ASETNNNN               | 316     |     |
| Arabidopsis_thaliana_Xrcc3             | : | VYVITNOVTDLV                                                   |   | -ETSDGLSGLRIGNLR      |   | YLYSSGRVVSFL                |   | LAWANCVNSRFFL    | FL            | -SRSDGSIKDRSEKDENCSS    | 267     |     |
| Oryza_sativa_Xrcc3                     | : | VYVITNOVDVV                                                    |   | -EGEAGNT              |   | VWSSGRVSPAL                 |   | GLAWANCVNSRFFL   | FL            | -TRDADRGCA              | 256     |     |
| Mus_musculus_Xrcc3                     | : | VYVITNOVDMV                                                    |   | -EDQQSVSR             |   | SLGASEERLSPAL               |   | GLTIANQLLMRDMV   | DMV           | -DRTHEDDVTGLPRSP        | 308     |     |
| Homo_sapiens_Xrcc3                     | : | VYVITNOVTEAM                                                   |   | -EQQAAHG              |   | PLGFWDERVSPAL               |   | GLTIANQLLVBLA    | BLA           | -DLRLEEAAALGCP          | 305     |     |
| Danio_rerio_Xrcc3                      | : | VYVITNOVDVV                                                    |   | -DGNPGRG              |   | DYGLVGSKVLPA                |   | GLAWANQVMVRLM    | MLM           | -RRLAQVKSRSRSCA         | 307     |     |
| Micromonas_sp._Xrcc3                   | : | VYVITNHVSDAV                                                   |   | -RDDGRGGFDSRQRLRFGPSG |   | DLRSSGRVPQPAL               |   | GLFWANCVNSRFFL   | FL            | -SRTGSGAGGYDNDGRVGLVD   | 281     |     |
| Ostreococcus_lucimarinus_Xrcc3         | : | VYVITNHVDSV                                                    |   | -RENGTGAHGDGAVATRAMG  |   | EFTTSGRRVVPAL               |   | GLMWSNCVNAFL     | FL            | -TRRATRGQYVVGDDGDDGNAGV | 269     |     |
| Ectocarpus_siliculosus_Xrcc3           | : | VYVITNOVTARF                                                   |   | -GSSTIGGGGGRGQGTMGV   |   | VGGSGGGVSPAM                |   | GLLWSQCINASPSS   | SSS           | -IPSDVDTLLDGN           | 298     |     |
| Thalassiosira_pseudonana_Xrcc3         | : | VYVITNOVTASI                                                   |   | -AEGGGDGGV            |   | VASTQEHGVVPA                |   | GLIWSNCVTEYIL    | YL            | -QRKEATVATGANPTINYDGK   | 482     |     |
| Phaeodactylum_tricornutum_Xrcc3        | : | VYVITNOVA                                                      |   | -----                 |   | LSGVVTKPAL                  |   | GLSWAHCIDVYIIL   | IL            | -TRQERGGDAGVVF          | 333     |     |
| Fragilariopsis_cylindrus_Xrcc3         | : | VYVITNECTTKIPNDTTT                                             |   | -TTTTANTGGSTFRRCQ     |   | QQQQLPVLEPAL                |   | GLAWSQCNCVNFV    | FFV           | -RRLGVMTTCNNNNSSSDQ     | 285     |     |
| Pseudo-nitzschia_multiseriata_Xrcc3    | : | VYVITNECTSR                                                    |   | -PAAVAPTTTSG          |   | YNGGGRVLEPAL                |   | GLAWSQCNCVNSWF   | WF            | -VRKPGTETGGAARAAYEDG    | 275     |     |
| Pseudo-nitzschia_multistriata_Xrcc3    | : | VYVITNECTSR                                                    |   | -SS-----              |   | ESTTNSPVLEPAM               |   | GLAWSQCNCVNSFF   | FF            | -CRESRNNLNTAEXATXTTTS   | 378     |     |
| Seminavis_robusta_Xrcc3                | : | VYVITNOVTDCL                                                   |   | -----                 |   | NKQNLPA                     |   | GLSWANCVNSYV     | YV            | -RRRSAAAGGNSSTRADVNO    | 399     |     |
| Sulfolobus_solfataricus_Rad-A          | : | VYVITNOVMARP                                                   |   | -----                 |   | DMFYGDPTAVG                 |   | SHLYHPGIRL       | RL            | -KKSNG                  | 275     |     |
| Aeropyrum_pernix_Rad-A                 | : | VYVITNOVMARP                                                   |   | -----                 |   | DVFIYGDPTAVG                |   | SHLYHPGIRL       | RL            | -KKSNG                  | 274     |     |

N

g

r

|                                        | * | 720                                                                                             | *     | 740   | *     | 760   | *     | 780   | *     | 800    |       |
|----------------------------------------|---|-------------------------------------------------------------------------------------------------|-------|-------|-------|-------|-------|-------|-------|--------|-------|
| Arabidopsis_thaliana_Dmcl              | : | -----                                                                                           | ----- | ----- | ----- | ----- | ----- | ----- | ----- | TRVCKV | : 282 |
| Oryza_sativa_Dmcl                      | : | -----                                                                                           | ----- | ----- | ----- | ----- | ----- | ----- | ----- | QVCKI  | : 282 |
| Mus_musculus_Dmcl                      | : | -----                                                                                           | ----- | ----- | ----- | ----- | ----- | ----- | ----- | LIAKI  | : 285 |
| Homo_sapiens_Dmcl                      | : | -----                                                                                           | ----- | ----- | ----- | ----- | ----- | ----- | ----- | LIAKI  | : 285 |
| Danio_rerio_Dmcl                       | : | -----                                                                                           | ----- | ----- | ----- | ----- | ----- | ----- | ----- | LIAKI  | : 285 |
| Ectocarpus_siliculosus_Dmcl            | : | -----                                                                                           | ----- | ----- | ----- | ----- | ----- | ----- | ----- | EVAKI  | : 271 |
| Oryza_sativa_Rad51-A                   | : | -----                                                                                           | ----- | ----- | ----- | ----- | ----- | ----- | ----- | EICKV  | : 283 |
| Arabidopsis_thaliana_Rad51-A           | : | -----                                                                                           | ----- | ----- | ----- | ----- | ----- | ----- | ----- | EICKV  | : 283 |
| Mus_musculus_Rad51-A                   | : | -----                                                                                           | ----- | ----- | ----- | ----- | ----- | ----- | ----- | TICKI  | : 283 |
| Homo_sapiens_Rad51-A                   | : | -----                                                                                           | ----- | ----- | ----- | ----- | ----- | ----- | ----- | TICKI  | : 283 |
| Danio_rerio_Rad51-A                    | : | -----                                                                                           | ----- | ----- | ----- | ----- | ----- | ----- | ----- | TICKI  | : 283 |
| Chlamydomonas_reinhardtii_Rad51-A      | : | -----                                                                                           | ----- | ----- | ----- | ----- | ----- | ----- | ----- | NVVKI  | : 284 |
| Micromonas_sp._Rad51-A                 | : | -----                                                                                           | ----- | ----- | ----- | ----- | ----- | ----- | ----- | NIAKI  | : 284 |
| Ostreococcus_lucimarinus_Rad51-A       | : | -----                                                                                           | ----- | ----- | ----- | ----- | ----- | ----- | ----- | NVMKV  | : 283 |
| Ectocarpus_siliculosus_Rad51-A         | : | -----                                                                                           | ----- | ----- | ----- | ----- | ----- | ----- | ----- | NICQV  | : 282 |
| Phaeodactylum_tricornutum_Rad51-A      | : | -----                                                                                           | ----- | ----- | ----- | ----- | ----- | ----- | ----- | NICTV  | : 282 |
| Thalassiosira_pseudonana_Rad51-A       | : | -----                                                                                           | ----- | ----- | ----- | ----- | ----- | ----- | ----- | NICTV  | : 282 |
| Fragilariopsis_cylindrus_Rad51-A2      | : | -----                                                                                           | ----- | ----- | ----- | ----- | ----- | ----- | ----- | NIMQV  | : 282 |
| Fragilariopsis_cylindrus_Rad51-A1      | : | -----                                                                                           | ----- | ----- | ----- | ----- | ----- | ----- | ----- | NIMTV  | : 282 |
| Pseudo-nitzschia_multiseriata_Rad51-A2 | : | -----                                                                                           | ----- | ----- | ----- | ----- | ----- | ----- | ----- | NIMSV  | : 282 |
| Pseudo-nitzschia_multiseriata_Rad51-A1 | : | -----                                                                                           | ----- | ----- | ----- | ----- | ----- | ----- | ----- | NIMTV  | : 282 |
| Pseudo-nitzschia_multistriata_Rad51-A2 | : | -----                                                                                           | ----- | ----- | ----- | ----- | ----- | ----- | ----- | NIMSV  | : 282 |
| Pseudo-nitzschia_multistriata_Rad51-A1 | : | -----                                                                                           | ----- | ----- | ----- | ----- | ----- | ----- | ----- | NIMTV  | : 282 |
| Seminavis_robusta_Rad51-A              | : | -----                                                                                           | ----- | ----- | ----- | ----- | ----- | ----- | ----- | NICTV  | : 233 |
| Arabidopsis_thaliana_Rad51-B           | : | -----                                                                                           | ----- | ----- | ----- | ----- | ----- | ----- | ----- | QIICKV | : 307 |
| Oryza_sativa_Rad51-B                   | : | -----                                                                                           | ----- | ----- | ----- | ----- | ----- | ----- | ----- | EYIKV  | : 306 |
| Mus_musculus_Rad51-B                   | : | -----                                                                                           | ----- | ----- | ----- | ----- | ----- | ----- | ----- | RQILLI | : 313 |
| Homo_sapiens_Rad51-B                   | : | -----                                                                                           | ----- | ----- | ----- | ----- | ----- | ----- | ----- | RQILLI | : 313 |
| Danio_rerio_Rad51-B                    | : | -----                                                                                           | ----- | ----- | ----- | ----- | ----- | ----- | ----- | RQIVI  | : 303 |
| Chlamydomonas_reinhardtii_Rad51-B      | : | -----                                                                                           | ----- | ----- | ----- | ----- | ----- | ----- | ----- | RFLKV  | : 328 |
| Micromonas_pusilla_Rad51-B             | : | -----                                                                                           | ----- | ----- | ----- | ----- | ----- | ----- | ----- | EVVKV  | : 376 |
| Ostreococcus_lucimarinus_Rad51-B       | : | -----                                                                                           | ----- | ----- | ----- | ----- | ----- | ----- | ----- | RALKI  | : 295 |
| Ectocarpus_siliculosus_Rad51-B         | : | -----                                                                                           | ----- | ----- | ----- | ----- | ----- | ----- | ----- | QAATF  | : 304 |
| Thalassiosira_pseudonana_Rad51-B       | : | -----                                                                                           | ----- | ----- | ----- | ----- | ----- | ----- | ----- | QKATI  | : 254 |
| Phaeodactylum_tricornutum_Rad51-B      | : | GRAP                                                                                            | ----- | ----- | ----- | ----- | ----- | ----- | ----- | SQLSV  | : 392 |
| Fragilariopsis_cylindrus_Rad51-B       | : | NEFGINLNSRQSMQSDHHRV                                                                            | ----- | ----- | ----- | ----- | ----- | ----- | ----- | TKIAV  | : 495 |
| Pseudo-nitzschia_multiseriata_Rad51-B  | : | NGNGSHNDSISRQTTTLPHTRV                                                                          | ----- | ----- | ----- | ----- | ----- | ----- | ----- | TKIVV  | : 418 |
| Pseudo-nitzschia_multistriata_Rad51-B  | : | NRNGFQWEKAIPTHLI                                                                                | ----- | ----- | ----- | ----- | ----- | ----- | ----- | TKIAV  | : 435 |
| Seminavis_robusta_Rad51-B              | : | REN                                                                                             | ----- | ----- | ----- | ----- | ----- | ----- | ----- | ATATI  | : 349 |
| Arabidopsis_thaliana_Rad51-C           | : | -----                                                                                           | ----- | ----- | ----- | ----- | ----- | ----- | ----- | EYAYI  | : 303 |
| Oryza_sativa_Rad51-C                   | : | -----                                                                                           | ----- | ----- | ----- | ----- | ----- | ----- | ----- | EYGFL  | : 309 |
| Mus_musculus_Rad51-C                   | : | -----                                                                                           | ----- | ----- | ----- | ----- | ----- | ----- | ----- | QFATL  | : 309 |
| Homo_sapiens_Rad51-C                   | : | -----                                                                                           | ----- | ----- | ----- | ----- | ----- | ----- | ----- | QLATL  | : 309 |
| Danio_rerio_Rad51-C                    | : | -----                                                                                           | ----- | ----- | ----- | ----- | ----- | ----- | ----- | RLASL  | : 301 |
| Chlamydomonas_reinhardtii_Rad51-C      | : | -----                                                                                           | ----- | ----- | ----- | ----- | ----- | ----- | ----- | EHAQM  | : 311 |
| Micromonas_pusilla_Rad51-C             | : | -----                                                                                           | ----- | ----- | ----- | ----- | ----- | ----- | ----- | RTAYL  | : 304 |
| Ostreococcus_lucimarinus_Rad51-C       | : | -----                                                                                           | ----- | ----- | ----- | ----- | ----- | ----- | ----- | EVAVV  | : 309 |
| Ectocarpus_siliculosus_Rad51-C         | : | -----                                                                                           | ----- | ----- | ----- | ----- | ----- | ----- | ----- | EVFAEL | : 269 |
| Phaeodactylum_tricornutum_Rad51-C      | : | -----                                                                                           | ----- | ----- | ----- | ----- | ----- | ----- | ----- | VTCTL  | : 317 |
| Thalassiosira_pseudonana_Rad51-C       | : | -----                                                                                           | ----- | ----- | ----- | ----- | ----- | ----- | ----- | AVCTL  | : 386 |
| Fragilariopsis_cylindrus_Rad51-C       | : | DGEDYNRGPVAVLQQ                                                                                 | ----- | ----- | ----- | ----- | ----- | ----- | ----- | VTCTL  | : 318 |
| Pseudo-nitzschia_multiseriata_Rad51-C  | : | TEHDRDPTSSVTRTR                                                                                 | ----- | ----- | ----- | ----- | ----- | ----- | ----- | VTCSL  | : 442 |
| Pseudo-nitzschia_multistriata_Rad51-C  | : | ENDNDYDRPAVLRP                                                                                  | ----- | ----- | ----- | ----- | ----- | ----- | ----- | VTCSL  | : 454 |
| Seminavis_robusta_Rad51-C              | : | -----                                                                                           | ----- | ----- | ----- | ----- | ----- | ----- | ----- | VTCTL  | : 322 |
| Arabidopsis_thaliana_Xrcc3             | : | SVSRSA                                                                                          | ----- | ----- | ----- | ----- | ----- | ----- | ----- | KRLDI  | : 279 |
| Oryza_sativa_Xrcc3                     | : | -----                                                                                           | ----- | ----- | ----- | ----- | ----- | ----- | ----- | RRMNV  | : 262 |
| Mus_musculus_Xrcc3                     | : | -----                                                                                           | ----- | ----- | ----- | ----- | ----- | ----- | ----- | VTLRV  | : 314 |
| Homo_sapiens_Xrcc3                     | : | -----                                                                                           | ----- | ----- | ----- | ----- | ----- | ----- | ----- | ATLRV  | : 311 |
| Danio_rerio_Xrcc3                      | : | -----                                                                                           | ----- | ----- | ----- | ----- | ----- | ----- | ----- | PKLEV  | : 313 |
| Micromonas_sp._Xrcc3                   | : | SGGTAVV                                                                                         | ----- | ----- | ----- | ----- | ----- | ----- | ----- | RHASV  | : 294 |
| Ostreococcus_lucimarinus_Xrcc3         | : | -----                                                                                           | ----- | ----- | ----- | ----- | ----- | ----- | ----- | ATLHV  | : 275 |
| Ectocarpus_siliculosus_Xrcc3           | : | -----                                                                                           | ----- | ----- | ----- | ----- | ----- | ----- | ----- | LAFASF | : 304 |
| Thalassiosira_pseudonana_Xrcc3         | : | DGSENGRCLEPLRNSTVLEQLDLSLVGRHESPDIQRPVVLSDIVIPILESIIQTEVNSVKNLQLPMKWRNGVDLHSNECPRLDLFLEMLPQLLNS | EQSC  | ----- | ----- | ----- | ----- | ----- | ----- | EQSC   | : 582 |
| Phaeodactylum_tricornutum_Xrcc3        | : | -----                                                                                           | ----- | ----- | ----- | ----- | ----- | ----- | ----- | RVTL   | : 339 |
| Fragilariopsis_cylindrus_Xrcc3         | : | QQHQHQHQKSSSSSTATSTTMLPTTNGSNNNKSNNSNNKVVY                                                      | ----- | ----- | ----- | ----- | ----- | ----- | ----- | RLHLC  | : 335 |
| Pseudo-nitzschia_multiseriata_Xrcc3    | : | ANAARATTTTTTATATNGGRGC                                                                          | ----- | ----- | ----- | ----- | ----- | ----- | ----- | PVLR   | : 304 |
| Pseudo-nitzschia_multistriata_Xrcc3    | : | TTIAESIQTSDSVQV                                                                                 | ----- | ----- | ----- | ----- | ----- | ----- | ----- | CRVLQ  | : 400 |
| Seminavis_robusta_Xrcc3                | : | G                                                                                               | ----- | ----- | ----- | ----- | ----- | ----- | ----- | LHIFL  | : 406 |
| Sulfolobus_solfataricus_Rad-A          | : | -----                                                                                           | ----- | ----- | ----- | ----- | ----- | ----- | ----- | RIARV  | : 281 |
| Aeropyrum_pernix_Rad-A                 | : | -----                                                                                           | ----- | ----- | ----- | ----- | ----- | ----- | ----- | RIARV  | : 280 |

```

Arabidopsis_thaliana_Dmcl1 : YDA-PNLAEAE-----ASFOITQGGIADAKD : 307
Oryza_sativa_Dmcl1 : FDA-PNLPEGE-----AVFQVTSGGIMDAKD : 307
Mus_musculus_Dmcl1 : YDS-PEMPENE-----ATFATITAGIGDAKE : 310
Homo_sapiens_Dmcl1 : YDS-PEMPENE-----ATFATITAGIGDAKE : 310
Danio_erio_Dmcl1 : FDS-PHMPENE-----ATFATITAGIITDAKD : 310
Ectocarpus_siliculosus_Dmcl1 : FDS-PSMPEAE-----CFPRITNGSITDTD- : 295
Oryza_sativa_Rad51-A : ISS-PCLAEAE-----ARFQIASEGVADVVD : 308
Arabidopsis_thaliana_Rad51-A : ISS-PCLPEAE-----ARFQIASEGVTDCKD : 308
Mus_musculus_Rad51-A : YDS-PCLPEAE-----AMFALINADSVGDAKD : 308
Homo_sapiens_Rad51-A : YDS-PCLPEAE-----AMFALINADSVGDAKD : 308
Danio_erio_Rad51-A : YDS-PCLPEAE-----AMFALINADSVGDAKD : 308
Chlamydomonas_reinhardtii_Rad51-A : IAS-PSLEERE-----ANFALGQEVTDADK : 309
Micromonas_sp._Rad51-A : ACS-PVLPPESE-----AQFSTISELGIEDAKD : 309
Ostreococcus_lucimarinus_Rad51-A : VCS-FVLPPESE-----AQFSTISEFGIEDAKD : 308
Ectocarpus_siliculosus_Rad51-A : FDS-PTLAESE-----CQFSIGFVGVEDPKD : 307
Phaeodactylum_tricornutum_Rad51-A : FDS-PTLPEAD-----AQFVAVGAQVCDADQ : 307
Thalassiosira_pseudonana_Rad51-A : FDS-PTLPEAD-----AQFVAVGFSIGCDATD : 307
Fragilariopsis_cylindrus_Rad51-A2 : FDS-PSLPEAD-----CQFALSSSIIADATE : 307
Fragilariopsis_cylindrus_Rad51-A1 : YDS-PSLPEAD-----ASPAISGAGVCDATE : 307
Pseudo-nitzschia_multiseriata_Rad51-A2 : YDS-PSLPEAD-----CQFALSNAGVCDATD : 307
Pseudo-nitzschia_multiseriata_Rad51-A1 : FDS-PSLPEAD-----AQFVAVGAGVCDATD : 307
Pseudo-nitzschia_multiseriata_Rad51-A2 : YDS-PSLPEAD-----CQFALSNAGVCDATD : 307
Pseudo-nitzschia_multiseriata_Rad51-A1 : XDS-PSLPEAD-----AQFVAVSAGVCDATD : 307
Seminavis_robusta_Rad51-A : YDS-PTLPEAD-----AQFALGQVQVCDPTE : 258
Arabidopsis_thaliana_Rad51-B : AKS-PMSEPLA-----FFFHITSAIGILLSD : 332
Oryza_sativa_Rad51-B : AKS-PMTEAVA-----FFFTVRESSIILLSD : 331
Mus_musculus_Rad51-B : AKS-PLAFTS-----FWYTKKEGLVLQGH : 338
Homo_sapiens_Rad51-B : AKS-PLAFTS-----FWYTKKEGLVLQAY : 338
Danio_erio_Rad51-B : AKS-PVAFFAV-----LSVYTKKEGIRLEEN : 328
Chlamydomonas_reinhardtii_Rad51-B : AKS-PSCANVV-----LEVYVIGPTSLQEVPR : 353
Micromonas_pusilla_Rad51-B : VKS-PRCALAG-----FEMVBRAGVVVDGD : 401
Ostreococcus_lucimarinus_Rad51-B : VKS-PLAELTS-----FEMVBRDASGIRVSGK : 320
Ectocarpus_siliculosus_Rad51-B : V--PRALP-----YFARASLPHLFGLEV : 325
Thalassiosira_pseudonana_Rad51-B : TKS-LVSKRAE-----VAFQITQSGICEV-- : 277
Phaeodactylum_tricornutum_Rad51-B : IKS-NLTGPGKP-----IVFDLTLFGIVIKA : 417
Fragilariopsis_cylindrus_Rad51-B : VKS-NRTGFSE-----AGFESTMTGIVEDSI : 520
Pseudo-nitzschia_multiseriata_Rad51-B : VKS-NRTALGE-----TRFALITSTGIVED-- : 441
Pseudo-nitzschia_multiseriata_Rad51-B : VKS-NTALGE-----TQFALITTAIGIEDRP : 460
Seminavis_robusta_Rad51-B : VKS-NLVGLQS-----VKYQIVGAGVVDDAVE : 374
Arabidopsis_thaliana_Rad51-C : DKS-PSLESAS-----ASVYVTSRGLRNSSS : 328
Oryza_sativa_Rad51-C : DKS-PSLIVAS-----APYAVTVKGVDRDAVN : 334
Mus_musculus_Rad51-C : YKS-PSQKEST-----IPFQITPQCFRDAVV : 334
Homo_sapiens_Rad51-C : YKS-PSQKECT-----VLFQIKPQCFRDTVV : 334
Danio_erio_Rad51-C : YKS-PSQMEAT-----VQVQITVQCFRDSPD : 326
Chlamydomonas_reinhardtii_Rad51-C : IKS-PHLPLGD-----AAFAVTDGIRLSLPR : 336
Micromonas_pusilla_Rad51-C : YKS-PRLPQGR-----ARVTVTEGIRDVDRG : 329
Ostreococcus_lucimarinus_Rad51-C : TKS-PRLPQAR-----ARVAVTAGIRDVDRG : 334
Ectocarpus_siliculosus_Rad51-C : LKS-PRLRRKT-----VPFSVVGVGIRDTQS : 294
Phaeodactylum_tricornutum_Rad51-C : VKS-PRLASGS-----ADYQILQCCIRGVDA : 342
Thalassiosira_pseudonana_Rad51-C : VKS-EHKFPGT-----ALFALTNKIGIRGVPS : 411
Fragilariopsis_cylindrus_Rad51-C : IKS-AHRTGT-----AQFHLLEMGIIRDAPD : 343
Pseudo-nitzschia_multiseriata_Rad51-C : IKS-SHRATGT-----ATYRLLEDGIRDVPR : 467
Pseudo-nitzschia_multiseriata_Rad51-C : VKS-SHRETRG-----ALVRLLEEIRDVVR : 479
Seminavis_robusta_Rad51-C : TKS-ENRPSGV-----STFKLLEAGIRDIRD : 347
Arabidopsis_thaliana_Xrcc3 : VFS-PYLPFGSS-----CEFMITREICAVQA : 304
Oryza_sativa_Xrcc3 : AFA-PHLPERA-----CEVYVRRDGVFGVPE : 287
Mus_musculus_Xrcc3 : LFA-PHLPSS-----CCYVTSVSGEIRGMPG : 339
Homo_sapiens_Xrcc3 : LSA-PHLPSS-----CSYVTSVSAEIVRGTPG : 336
Danio_erio_Xrcc3 : VFA-PHLPRS-----CLCGVWEEVIRGIPD : 338
Micromonas_sp._Xrcc3 : VFS-SHLFSTAPAWGGALDDGWSSAVRPECVAVREDEVWVGEA : 337
Ostreococcus_lucimarinus_Xrcc3 : VYA-PHLPSS-----VDFVVRDCAWDVAA : 300
Ectocarpus_siliculosus_Xrcc3 : ATC-CTVPSVS-----YFY----- : 317
Thalassiosira_pseudonana_Xrcc3 : SLC-RRQLELETEQLIGTNNLGDCHRIQHKTCY--VCVEHVCNTCN : 624
Phaeodactylum_tricornutum_Xrcc3 : ASS-SHATGQH-----KAPFRADGVVAG-- : 362
Fragilariopsis_cylindrus_Xrcc3 : LKA-PHISSEHAK-----LEPTIDHSVIPIQN : 362
Pseudo-nitzschia_multiseriata_Xrcc3 : RKA-PHVSDSSG-----AEFVLDRSVAVATAF : 330
Pseudo-nitzschia_multiseriata_Xrcc3 : LRA-SHISSEYSR-----AEFVLDRSVAVHPEH : 427
Seminavis_robusta_Xrcc3 : AKSANHAVDQN-----ASEVLDSGVVRMDET : 432
Sulfolobus_solfataricus_Rad-A : VDA-PHLPEGE-----VVFAITTEEIRDAEE : 306
Aeropyrum_ernix_Rad-A : VDA-PHLPEGE-----TVFAITTEWIRDPDE : 304

```
